1 **Placental DNA methylation levels at *CYP2E1* and *IRS2* are associated with child**  
2 **outcome in a prospective autism study**

3

4 Yihui Zhu<sup>1,2</sup>: yhzhu@ucdavis.edu

5 Charles E. Mordaunt<sup>1,2</sup>: cemordaunt@ucdavis.edu

6 Dag H. Yasui<sup>1,2</sup>: dhyasui@ucdavis.edu

7 Ria Marathe<sup>1,2</sup>: rmarathe@ucdavis.edu

8 Rochelle L. Coulson<sup>1,2</sup>: rlcoulson@ucdavis.edu

9 Keith W. Dunaway<sup>1,2</sup>: kwdunaway@ucdavis.edu

10 Cheryl K. Walker<sup>2,3</sup>: ckwalker@phs.ucdavis.edu

11 Sally Ozonoff<sup>2,4</sup>: sozonoff@ucdavis.edu

12 Irva Hertz-Picciotto<sup>2,5</sup>: iher@ucdavis.edu

13 Rebecca J. Schmidt<sup>2,5\*</sup>: rjschmidt@ucdavis.edu

14 Janine M. LaSalle<sup>1,2\*</sup>: jmlasalle@ucdavis.edu

15 \* Last authors contributed equally to this study

16

17 1. Department of Medical Microbiology and Immunology, Genome Center, University of

18 California, Davis, CA, USA

19 2. MIND (Medical Investigations of Neurodevelopmental Disorder) Institute, University of

20 California, Davis, CA, USA

21 3. Department of Obstetrics & Gynecology, School of Medicine, University of California,

22 Davis, CA, USA

23 4. Department of Psychiatry and Behavioral Sciences, School of Medicine, University of  
24 California, Davis, CA, USA

25 5. Department of Public Health Sciences, University of California, Davis, CA, USA

26

27 Corresponding author:

28 Janine M. LaSalle, PhD

29 Department of Medical Microbiology and Immunology

30 3428 Tupper Hall

31 One Shields Avenue

32 University of California, Davis

33 Davis, CA, 95616

34 Phone: 530-754-7598

35 Email: [jmlasalle@ucdavis.edu](mailto:jmlasalle@ucdavis.edu)

36 **Abstract**

37 DNA methylation acts at the interface of genetic and environmental factors relevant for  
38 autism spectrum disorder (ASD). Placenta, normally discarded at birth, is a potentially  
39 rich source of DNA methylation patterns predictive of ASD in the child. Here, we  
40 performed whole methylome analyses of placentas from a prospective study of high-risk  
41 pregnancies. 400 differentially methylated regions (DMRs) discriminated placentas  
42 stored from children later diagnosed with ASD compared to typical controls. These ASD  
43 DMRs were significantly enriched at promoters, mapped to 596 genes functionally  
44 enriched in neuronal development, and overlapped genetic ASD risk. ASD DMRs at  
45 *CYP2E1* and *IRS2* reached genome-wide significance, replicated by pyrosequencing,  
46 and correlated with expression. Methylation at *CYP2E1* associated with both ASD  
47 diagnosis and *cis* genotype, while methylation at *IRS2* was unaffected by *cis* genotype  
48 but modified by preconceptional maternal prenatal vitamin use. This study therefore  
49 identified two potentially useful early epigenetic markers for ASD in placenta.

## 50 **Introduction**

51 Autism spectrum disorder (ASD) is a heterogeneous neurodevelopmental disorder  
52 diagnosed by a combination of behavioral features including restricted interests,  
53 repetitive behaviors, language deficits, and impairments in social communication (Baio  
54 et al., 2018). 1 in 59 children in the United States are diagnosed with ASD, at a mean  
55 age of 4.2 years (Baio et al., 2018). ASD is currently diagnosed by clinicians trained on  
56 the Autism Diagnostic Observation Schedule (ADOS) and the Autism Diagnostic  
57 Interview - Revised (ADI-R) according to the Statistical Manual of Mental Disorders  
58 (DSM-5) which is most accurate at or after 36 months (Baio et al., 2018). However, an  
59 early assessment of ASD risk could identify infants and toddlers who would benefit from  
60 behavioral interventions that improve cognitive, social, and language skills.

61  
62 Monozygotic versus dizygotic twin and sibling studies suggest a strong genetic basis for  
63 ASD (Hannon et al., 2018; M. B. Jones & Szatmari, 1988; Ritvo et al., 1989; Tsai & Bell,  
64 2015; Wessels & Pompe van Meerdervoort, 1979). However, mutations in any individual  
65 gene account for less than 1% of ASD cases (Bourgeron, 2015; Tsai & Bell, 2015).

66 Genetic sequencing analyses can only identify a potentially causative genetic  
67 abnormality in ~25% of clinical ASD diagnoses (Bourgeron, 2015; Tsai & Bell, 2015;  
68 Turner et al., 2016). While genome-wide association studies (GWAS) also support  
69 common genetic variants in ASD, the complexity and heterogeneity of ASD has been a  
70 major challenge (Abrahams et al., 2013; Grove et al., 2017; Iossifov et al., 2014;  
71 Sanders et al., 2015). Evidence for environmental risk factors in ASD point to *in utero*  
72 maternal exposures such as air pollution, fever, or asthma and nutrients specifically the

73 absence of pre-conceptional prenatal vitamin intake (Raz et al., 2015; Schmidt et al.,  
74 2011, 2012; Zerbo et al., 2013). Maternal prenatal vitamins, which contain high levels of  
75 folate and other additional B vitamins, protect offspring by up to 70% for neural tube  
76 defects (Caramaschi et al., 2017; Howsmon, Kruger, Melnyk, James, & Hahn, 2017;  
77 Kalkbrenner, Schmidt, & Penlesky, 2014; Relton et al., 2004; Rush, Katre, & Yajnik,  
78 2014; Zeisel, 2009), and correlate with an overall 40% reduction in ASD risk if taken  
79 during the first month of pregnancy (P1) (Schmidt et al., 2011, 2012; Suren et al., 2013).  
80 This finding was replicated with a large prospective study in Norway including over  
81 80,000 pregnancies (Suren et al., 2013).

82  
83 DNA methylation shows dynamic changes during fetal development (Vogel Ciernia &  
84 LaSalle, 2016; Crawley, Heyer, & LaSalle, 2016; Smallwood & Kelsey, 2012b) and  
85 contains the molecular memory of *in utero* experiences such as maternal nutrition  
86 (Howsmon et al., 2017; Teh et al., 2014). Term placenta is an accessible fetal tissue  
87 that maintains the distinctive embryonic bimodal DNA methylation pattern, in which  
88 expressed genes are marked by higher methylation levels (Schmidt et al., 2016;  
89 Schroeder et al., 2013, 2015, 2016). Placenta therefore offers a unique window to study  
90 DNA methylation patterns that may reflect altered fetal development relevant to ASD  
91 genetic risk (Schroeder et al., 2015; Smallwood & Kelsey, 2012b, 2012a; Watson &  
92 Cross, 2005). Specifically, a recent study of polygenic risk scores for schizophrenia  
93 demonstrated a significant interaction of genetic risk with maternal perinatal  
94 environmental factors that affected placental gene expression (Ursini et al., 2018).  
95 Previous analyses of DNA methylation patterns in placenta samples from a high-risk

96 ASD cohort also identified an association between self-reported use of lawn and garden  
97 pesticides and large-scale changes in DNA methylation patterns, and identified a  
98 putative enhancer of the *DLL1* gene as differentially methylated in ASD (Schmidt et al.,  
99 2016; Schroeder et al., 2016).

100

101 Here, we continue the epigenetic investigation of ASD risk through the novel approach  
102 of identifying differentially methylated regions (DMRs) in whole methylomes from  
103 placenta samples from male children later diagnosed with ASD compared to children  
104 with typical development (TD) controls. Two genome-wide significant ASD-associated  
105 DMRs at *CYP2E1* and *IRS2* were further validated and investigated for effects of  
106 genotype, RNA expression, and protein levels as well as interactions with preconception  
107 prenatal vitamin use. Understanding the epigenetic patterns of ASD associated with  
108 maternal prenatal vitamin use in placenta could lead to the development of preventative  
109 and therapeutic early interventions for high-risk children with ASD.

110 **Results**

111 **Placenta ASD DMRs discriminate ASD from TD samples.**

112 To identify novel differentially methylated gene loci between ASD and TD, a  
113 differentially methylated region (DMR) bioinformatic analysis was performed on placenta  
114 whole genome bisulfite sequencing (WGBS) data (Schmidt et al., 2016; Schroeder et  
115 al., 2016). 400 DMRs were identified with a threshold of > 10% methylation difference  
116 between ASD and TD groups, and these were associated with 596 genes (**Fig. 1A**,  
117 **Supplementary Table 1**). There was no bias for gene length in the ASD DMR  
118 associated genes compared to all human genes (**Supplementary Fig. 1**). 296 DMRs  
119 were hypermethylated, while 104 DMRs were hypomethylated in ASD compared to TD  
120 placenta (**Fig. 1A**). Principal component analysis (PCA) using methylation levels for  
121 each sample over the 400 DMRs demonstrated a clear separation of placental samples  
122 by child outcome of ASD versus TD (**Fig. 1B**). In addition, most ASD DMRs showed a  
123 highly significant association with Mullen Scales of Early Learning (MSEL) scores and  
124 autism severity score from Autism Diagnostic Observation Schedule (ADOS), but not  
125 with potential confounding variables (**Supplementary Table 2, Supplementary Fig. 2**).  
126

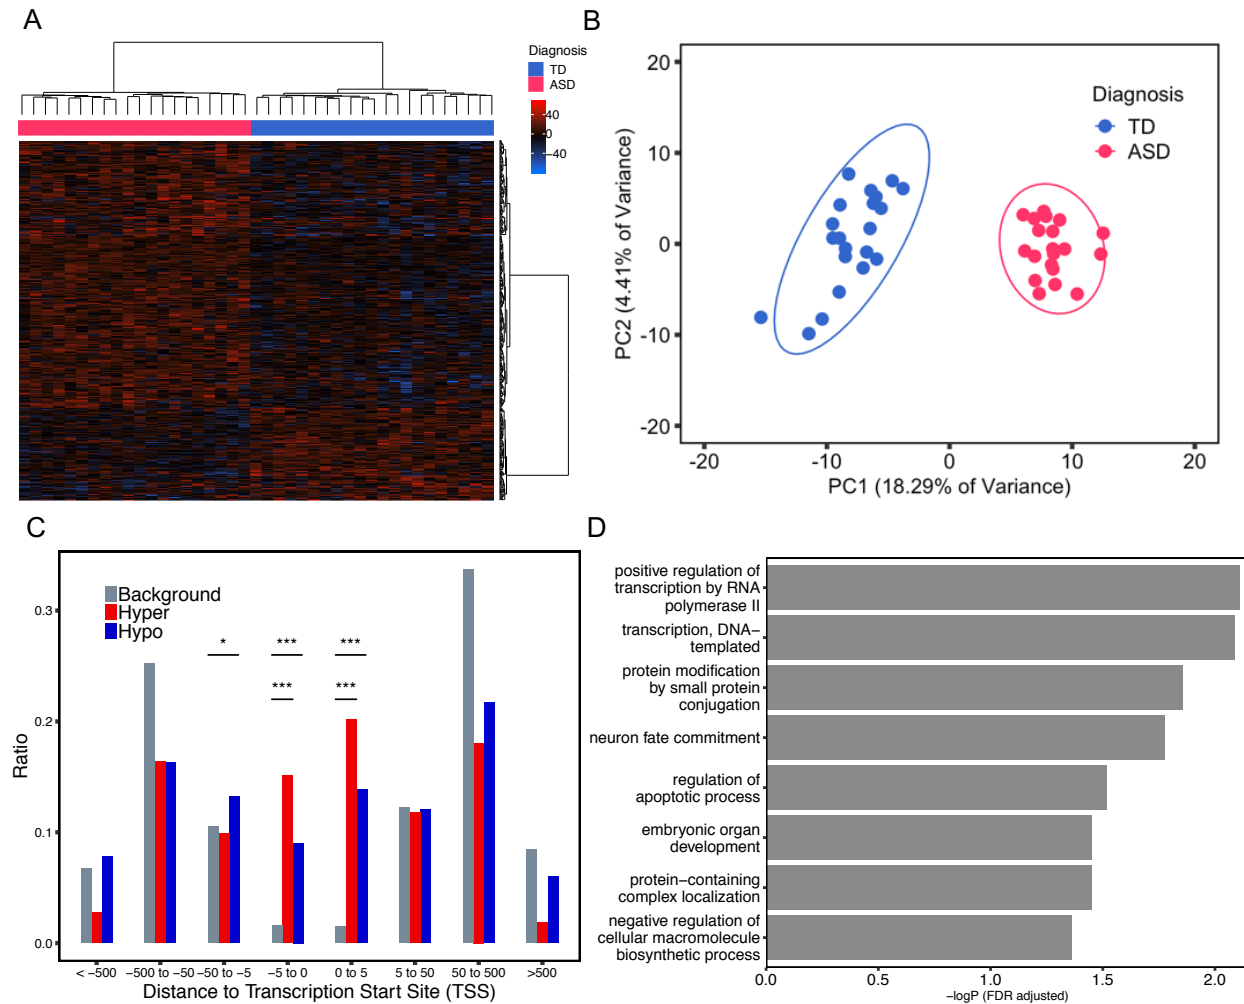

127

128 **Figure 1.** Differentially methylated regions (DMRs) in placenta distinguished ASD from  
 129 typical development (TD) child outcomes.

130 **A.** Heatmap and hierarchical clustering of 20 ASD versus 21 TD placental samples  
 131 using methylation levels in the 400 identified ASD DMRs. Percent methylation for each  
 132 sample relative to the mean methylation at each ASD DMR was plotted as a heatmap,  
 133 with black representing no difference, hyper-methylation (red) and hypo-methylation  
 134 (blue). Columns were clustered by child outcome, ASD (red) or TD (blue), while rows  
 135 were clustered by methylation direction. **B.** Principal component analysis (PCA) of TD  
 136 vs ASD placental samples on the basis of methylation at 400 ASD DMRs. Ellipses



137 represent the 95% confidence interval for each group. The non-overlapping ellipses  
138 showed a significant difference between ASD and TD for these DMRs' methylation level  
139 ( $p < 0.05$ ). **C.** Location relative to genes for hypermethylated (red) or hypomethylated  
140 (blue) ASD DMRs compared to background (grey). Distributions of locations relative to  
141 transcription start sites (TSS) are shown on the x-axis. The ratio plotted on the y-axis is  
142 calculated by the number of genes at each binned location divided by the total number  
143 of genes (**Supplementary Table 2**).  $*p < 0.05$ ,  $**p < 0.01$ ,  $***p < 0.001$  by Fisher's exact  
144 test. **D.** Bar graph represents the significant results from gene ontology and pathway  
145 enrichment analysis of ASD DMRs associated genes compared to background by  
146 Fisher's exact test (FDR adjusted  $-\log p$ -value, x-axis).

147

148 **Placenta ASD DMRs were enriched for transcription start sites and genes that**  
149 **function in transcriptional regulation and neuronal fate.**

150 To further study the location and function of ASD DMRs in placenta, we calculated the  
151 location of each ASD DMR relative to the assigned gene's transcription start site (TSS)  
152 (**Supplementary Table 3**). Both hyper- and hypomethylated ASD DMRs were enriched  
153 within 5kb on either side of TSS compared with background regions (**Fig. 1C**). Gene  
154 ontology (GO) analysis of ASD DMRs genes revealed significant enrichment for  
155 functions in transcription, protein modification, embryonic organ development, and  
156 neuron fate commitment by Fisher's exact test after false discovery rate (FDR) multiple  
157 test correction (**Fig. 1D, Supplementary Table 4**).

158

159 **Placenta DMR genes were enriched in ASD but not ID risk genes**

160 To test a hypothesized overlap between epigenetic and genetic ASD risk loci observed  
161 previously in ASD and neurodevelopmental disorder brain tissues (Vogel Ciernia et al.,  
162 2018), we investigated the possible overlap of placenta ASD DMR genes with identified  
163 genetic risk factors for ASD and other types of intellectual disability (ID). First, the  
164 curated Simons Foundation Autism Research Initiative (SFARI) gene list was separated  
165 into six categories based on SFARI ASD gene scores (Abrahams et al., 2013). The  
166 entire list of SFARI genes as well as the high confidence gene list both showed  
167 significant overlap with placenta ASD DMR genes (**Fig. 2A, Supplementary Table 5**).  
168 The 39 genes in common between the SFARI gene list and placenta ASD DMRs were  
169 significantly enriched for functions in positive regulation of histone H3K4 methylation,  
170 multicellular organ development, and system development. Second, high risk ASD  
171 genes from Sanders *et al.* (Sanders et al., 2015) and likely gene-disrupting (LGD)  
172 recurrent mutations and missense mutation on *de novo* mutations to ASD gene lists  
173 from whole genome exome sequencing (Iossifov et al., 2014) were also significantly  
174 enriched for placental ASD DMRs. In contrast, no significant enrichment was observed  
175 for placental ASD DMRs with ID, Alzheimer's disease, or lung cancer genetic risk  
176 (Gilissen et al., 2014) or a random set of 400 genomic regions mapped to 600 genes  
177 (**Fig. 2A, Supplementary Table 5**). When placental ASD DMRs were separated by  
178 direction of change, hypomethylated ASD DMRs exhibited more categories of  
179 significant enrichment with ASD genetic risk compared with hypermethylated ASD  
180 DMRs (**Supplementary Fig. 3**)

181

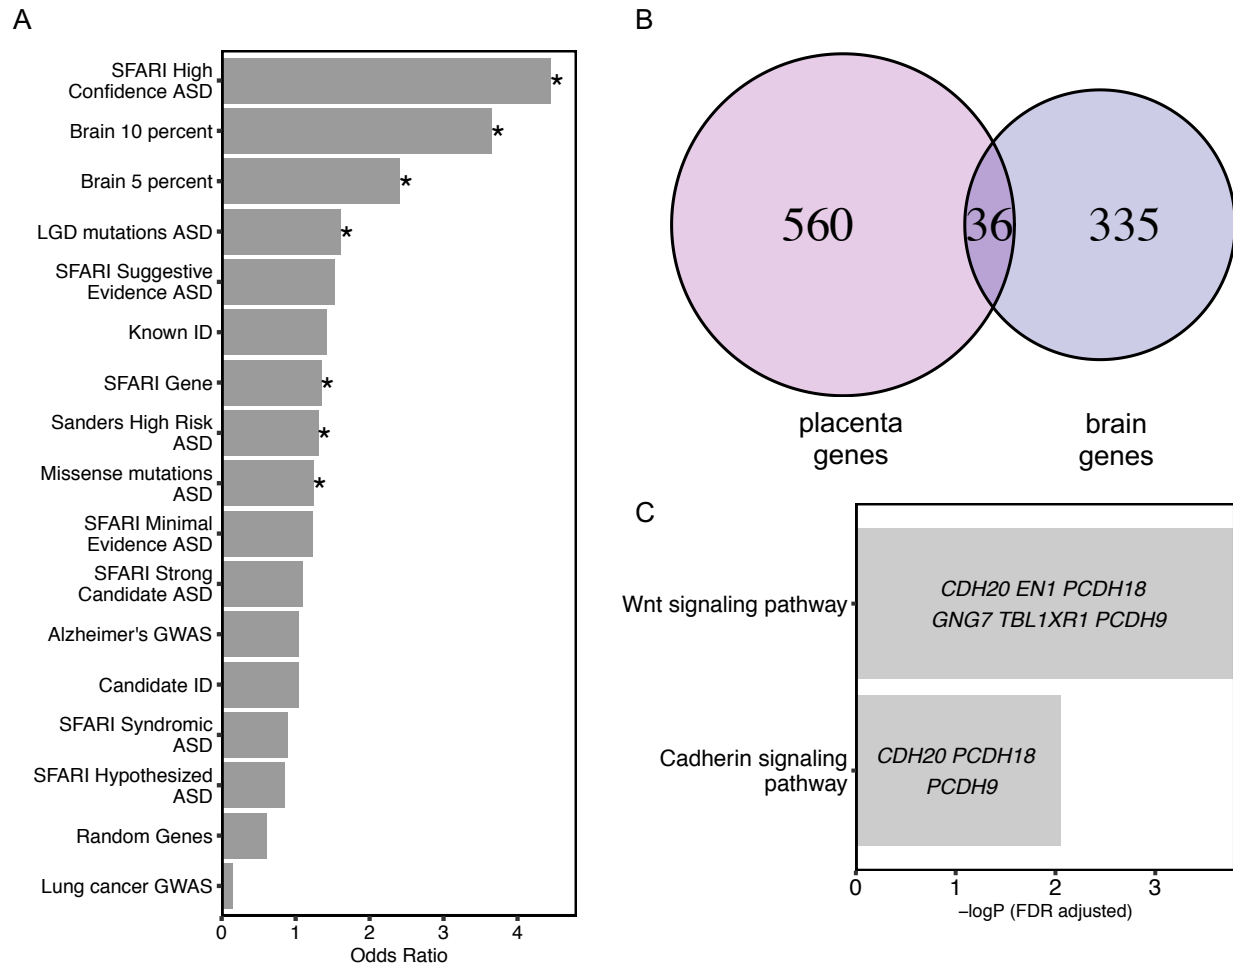

182

183 **Figure 2.** Placenta ASD DMR genes overlapped with ASD DMR associated genes from  
 184 postmortem brain and known genetic risk for ASD, but not for other disorders.

185 **A.** Placenta ASD DMR associated genes were compared for significant overlap with  
 186 ASD DMR genes identified from ASD postmortem brain (Vogel Ciernia et al, 2018,  
 187 based on 10% or 5% methylation difference cutoffs), as well as multiple curated gene  
 188 lists of ASD, intellectual disability, or unrelated disorder genetic risks, or a randomly  
 189 generated gene list (\* $p < 0.05$  FDR corrected two-tailed Fisher's exact test, ranked by  
 190 odds ratio). SFARI: Simons Foundation Autism Research Initiative (Abrahams et al.,  
 191 2013), LGD: likely gene disrupting mutation, ASD: autism spectrum disorder, Alzheimer:  
 192 Alzheimer's Disease, ID: intellectual disability. **B.** Venn diagram represents the overlap

193 of 36 genes associated with placenta ASD DMRs and brain ASD DMRs based on 10%  
194 methylation differences between ASD versus TD (**Supplementary Table 5**).

195 Methylation data from human postmortem brain was obtained from previous published  
196 datasets, GSE8154 (ASD and TD) (Vogel Ciernia et al., 2018). **C**. Gene ontology and  
197 pathway analysis on the 36 genes in common between placenta ASD DMRs and brain  
198 ASD DMRs associated genes. Enrichment tests were done on Fisher's exact test with  
199 FDR 0.05 correction. Genes in each gene ontology term are shown within each bar.

200

201 **Placenta ASD DMR genes significantly overlapped with brain ASD DMRs that**  
202 **were enriched for Wnt and cadherin signaling pathways.**

203 From a prior methylation analysis in brain frontal cortex, 210 ASD discriminating DMRs  
204 from brain (10% methylation difference between ASD and TD) were identified, which  
205 mapped to 371 genes (Vogel Ciernia et al., 2018). A significant overlap of ASD DMR  
206 genes was observed between placenta and brain (Fisher's exact test,  $p$ -value < 0.001),  
207 with 36 genes in commons (**Fig. 2B, Supplementary Table 5**). Those 36 genes were  
208 significantly enriched for functions in the Wnt signaling and cadherin signaling pathways  
209 (**Fig. 2C**). Of these shared genes four overlapped with SFARI genetic risk: *GADD45B*,  
210 *MC4R*, *PCDH9*, and *TBL1XR1*.

211

212 **Placenta ASD DMRs were enriched for placental and brain active promoter**  
213 **H3K4me3 peaks, promoter flanking regions, and CpG shores.**

214 To functionally annotate the ASD DMRs identified by placenta WGBS, multiple histone  
215 modification ChIP-seq peaks and chromatin state predictions from multiple tissue types

216 in the Roadmap Epigenomics Projects were compared to ASD DMR chromosomal  
217 locations for enrichment compared to background regions (Kundaje et al., 2015).  
218 Placental ASD DMRs were significantly enriched for H3K4me3 and H3K4me1 marks of  
219 promoters and enhancers across multiple tissues, although placental H3K4me3 marks  
220 showed the strongest (odds ratio = 17.08, FDR  $q < 1.8E-42$ ) and brain H3K4me3 marks  
221 showed the second strongest enrichment (odds ratio = 13.75, FDR  $q < 3.55E-31$ ) (**Fig.**  
222 **3A**). Next, we overlapped ASD DMRs with published chromatin state predictions that  
223 use histone modification ChIP-seq data to annotate the genome into 15 functional  
224 states (chromHMM) (Ernst & Kellis, 2012). Placental ASD DMRs showed significant  
225 enrichment in regions flanking transcription start site (TssAFlnk) and transcription start  
226 site (TssA) compared to background over multiple tissues (**Fig. 3B**). When separated by  
227 directional change in ASD, both hyper- and hypomethylated ASD DMRs were  
228 significantly enriched for H3K4me3 peaks, transcription start sites and their flanking  
229 regions, as well as enhancers (**Supplementary Fig. 4**).  
230

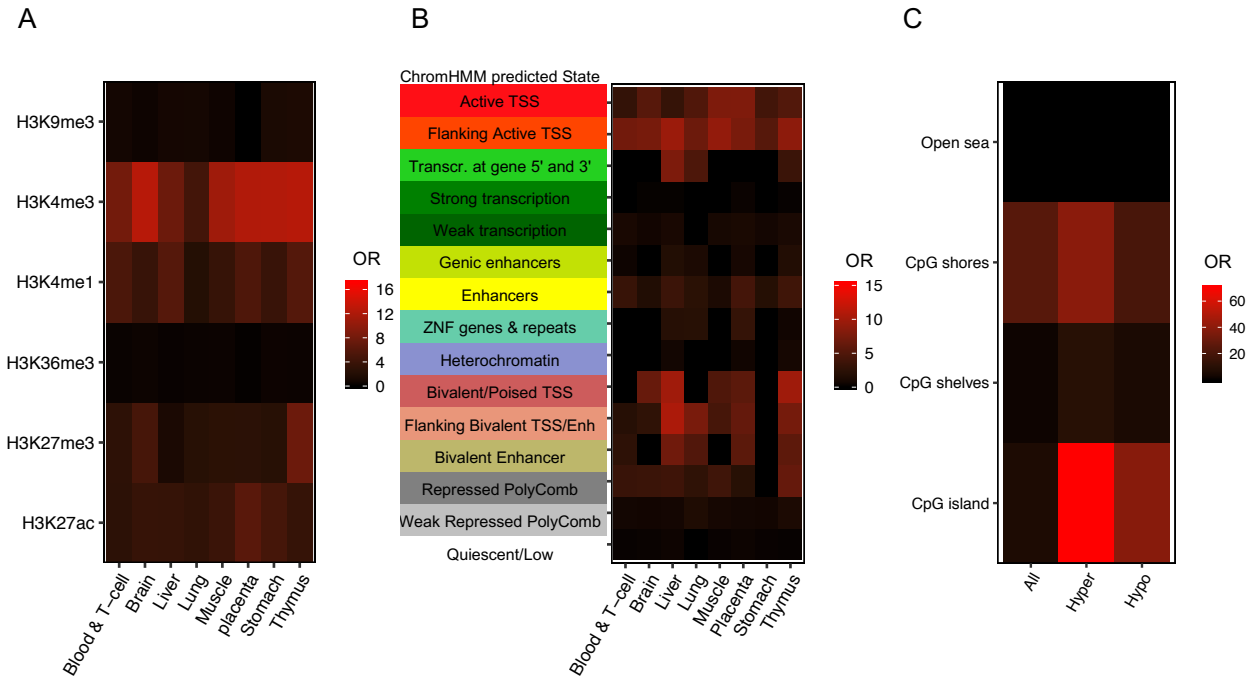

231

232 **Figure 3.** Placenta ASD DMRs were enriched at H3K4me3 regions, flanking promoter  
233 regions, and CpG shores.

234 **A.** Placenta ASD DMRs were examined for enrichment with histone modification ChIP-  
235 seq peaks from the Epigenome Roadmap using the LOLA package. Enrichments are  
236 plotted as the odds ratio) in a heat map for each of 8 different tissue types and 6 types  
237 of modified histone marks (Sheffield & Bock, 2016). **B.** Enrichment tests on chromatin  
238 states from chromHMM categories in the Epigenome Roadmap and placental ASD  
239 DMRs from this study were performed using LOLA, with each row representing a  
240 different ChromHMM predicted state and each column a single tissue type. **C.** Placenta  
241 ASD DMRs (categorized as all, hypermethylated, or hypomethylated in ASD) were  
242 tested for enrichment based on CpG island location. The human genome was  
243 separated into CpG islands, CpG shores, CpG shelves and open sea.

244

245 We also separated the genome into four parts relative to CpG island location (Aryee et  
246 al., 2014; Sandoval et al., 2011; Timp et al., 2014). CpG shores were defined as the  
247 region within 2 kb on both sides of CpG islands, while another 2 kb extension from the  
248 shores were defined as CpG shelves. The remaining regions were defined as “open  
249 sea”. Placental ASD DMRs showed significant enrichment at CpG shores, and  
250 hypermethylated ASD DMRs more significantly overlapped CpG islands compared with  
251 hypomethylated DMRs (**Fig. 3C**).

252

253 **Two genome-wide significant placental ASD DMRs at *CYP2E1* and *IRS2* validate**  
254 **by pyrosequencing and correlated with gene expression.**

255 Two of the 400 ASD DMRs identified in ASD placenta reached genome-wide  
256 significance by family-wide error rate (FWER), including chr10: 133527713-133529507,  
257 located inside *CYP2E1* (cytochrome P450 2E1), and chr13: 109781111-109782389  
258 located inside *IRS2* (insulin receptor substrate 2) (**Fig. 4**). The *CYP2E1* DMR was  
259 located after the first exon, included the first intron and part of the second exon, and  
260 was hypomethylated in ASD versus TD (**Fig. 4A**). The *IRS2* DMR, spanning the end of  
261 the first exon and the beginning of first intron and was hypermethylated in ASD versus  
262 TD (**Fig. 4B**). Both *CYP2E1* and *IRS2* were also present in the gene lists overlapping  
263 with brain ASD DMR related genes and high risk ASD genes (**Fig. 2A, Supplementary**  
264 **Table 5**) (Sanders et al., 2015).

265

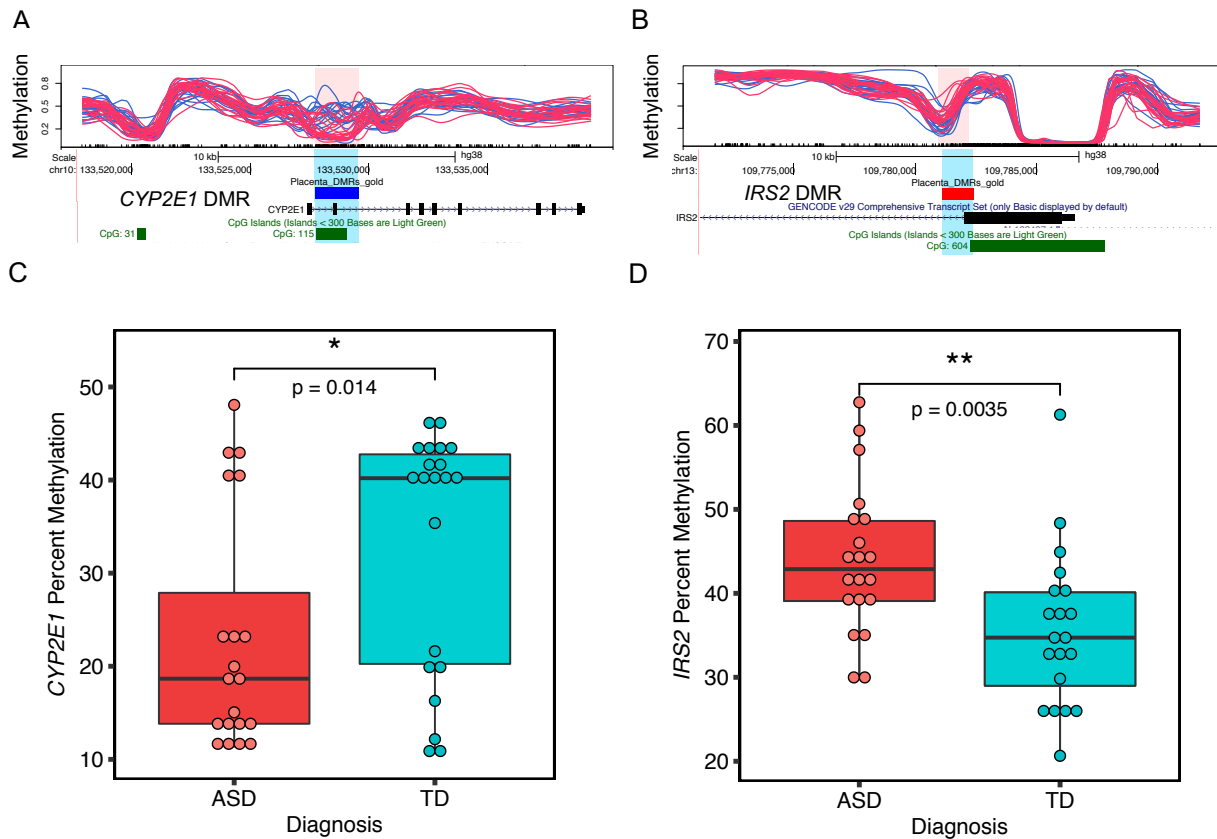

266

267 **Figure 4.** Two genome-wide significant placental DMRs located at *CYP2E1* and *IRS2*  
268 were validated by pyrosequencing.

269 **A** and **B** show the location relative to genes, and CpG islands of the two genome-wide  
270 significant DMRs (highlighted in pink and blue) in the UCSC Genome Browser. In the  
271 upper tracks, each line represents percent methylation (y-axis) of a single individual by  
272 WGBS analysis. Blue lines represent TD and red lines represent ASD samples. **A.**

273 Hypomethylated DMR at *CYP2E1* with 10 kb upstream and 10 kb downstream. **B.**

274 Hypermethylated DMR at *IRS2* with 10 kb upstream and 10 kb downstream. **C.** The

275 *CYP2E1* DMR percent methylation was significantly associated with child outcome and

276 verified by pyrosequencing (two-tailed t-test,  $p$ -value = 0.014). The y-axis represents the

277 average percent DNA methylation across the DMR regions from pyrosequencing. Each



278 dot represented one sample. **D.** Pyrosequencing validation on *IRS2* DMR's methylation  
279 with child outcome (two-tailed t-test,  $p$ -value = 0.0035). \* $p$  < 0.05, \*\* $p$  < 0.01

280

281 Pyrosequencing was performed as an independent method to verify methylation  
282 differences between ASD and TD placental samples at *CYP2E1* and *IRS2* DMRs  
283 (**Supplementary Table 6**). For the *CYP2E1* DMR, there was a significant difference in  
284 average percent methylation detected by pyrosequencing between ASD and TD  
285 samples (**Fig. 4C**). 13 CpG sites were included in the *CYP2E1* DMR pyrosequencing  
286 test, and all but two also showed individually significant differences between ASD and  
287 TD after false discovery rate (FDR) correction (**Supplementary Table 6**,  
288 **Supplementary Fig. 5A**). Pyrosequencing also confirmed a significant difference  
289 between ASD and TD average percent methylation at the *IRS2* DMR (**Fig. 4D**) and all  
290 of the 11 CpG sites individually assayed at *IRS2* (**Supplementary Table 6**,  
291 **Supplementary Fig. 5B**).

292

293 While MARBLES placenta samples were not collected in a manner conducive to RNA  
294 stability for gene expression analyses, we were able to examine expression level of  
295 both *CYP2E1* and *IRS2* in MARBLES umbilical cord blood from an Affymetrix Human  
296 Gene 2.0 array analysis in a related study (Mordaunt, Park, et al., 2018). A trend for  
297 lower *CYP2E1* transcript levels was observed in ASD compared with TD cord blood  
298 samples (**Fig. 5A**) consistent with the direction of the placental methylation for this locus  
299 (**Fig. 4C**). Similarly, a trend for higher *IRS2* expression in ASD versus TD cord blood  
300 was observed along with higher ASD methylation in placenta (**Fig. 4D, Fig. 5B**). To

301 investigate the direction of expression changes for these genes in ASD brain, we  
302 utilized the dbMDEGA database (Zhang et al., n.d.). *CYP2E1* showed a significantly  
303 downregulated in ASD compared with TD in human male cortex, while *IRS2* trended for  
304 higher levels in ASD compared with TD. These were both in the same direction as ASD  
305 cord blood expression and ASD placental methylation compared to controls.  
306 Furthermore, a trend for higher *IRS2* protein in ASD placenta samples compared with  
307 TD placenta samples was observed by Western blot (**Fig. 5C, Supplementary Fig. 6**),  
308 as expected based on transcript and methylation levels. Because of the distinctive  
309 methylation landscape in placenta, positive correlations between methylation and  
310 expression were expected for gene body locations outside of CpG islands (Schroeder et  
311 al., 2013).

312

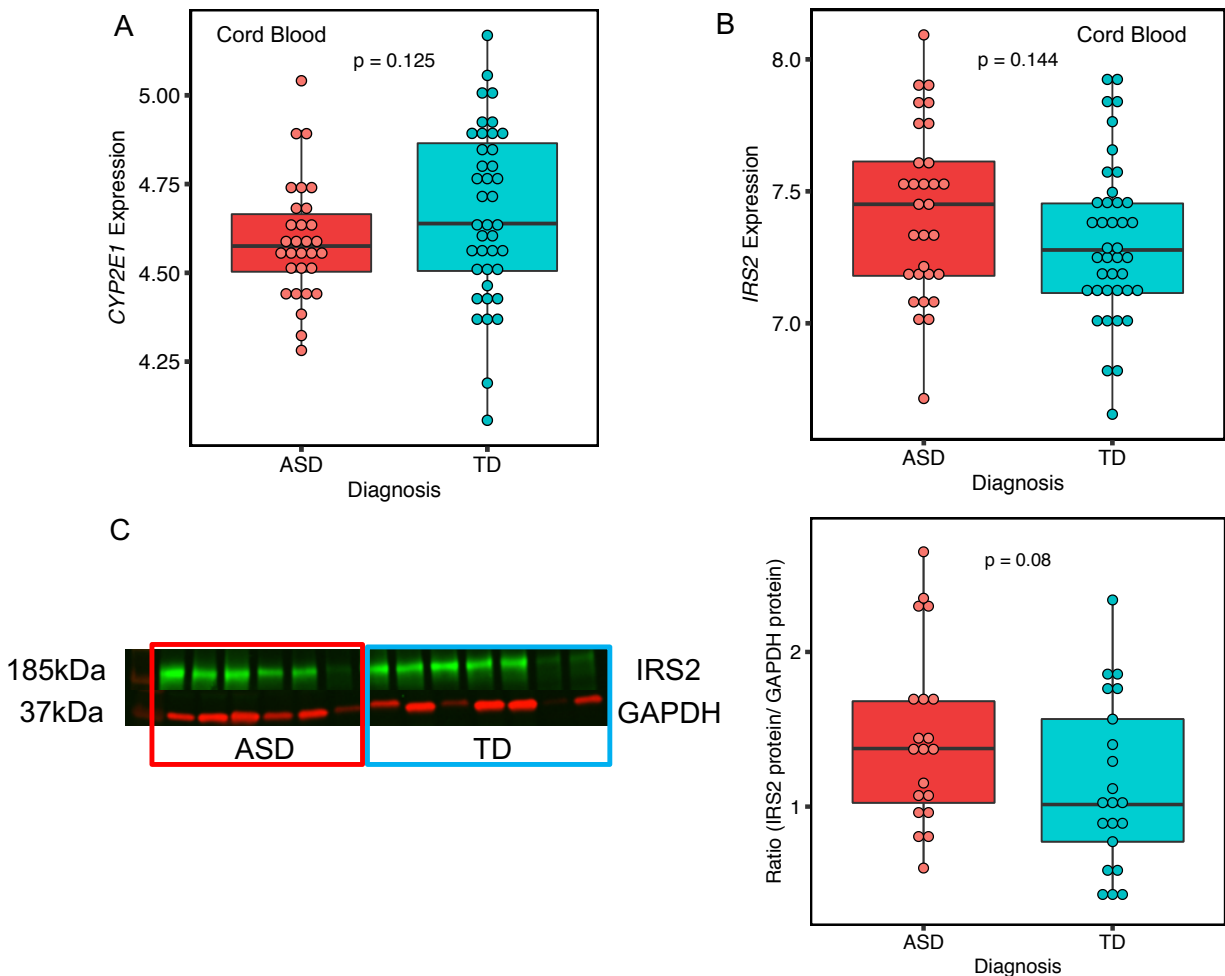

313

314 **Figure 5.** For both placental ASD DMRs at *CYP2E1* and *IRS2*, expression trended

315 towards positive correlation with methylation.

316 **A.** 30 ASD and 40 TD umbilical cord blood sample in MARBLES were included in this

317 analysis. Affymetric array matrix data on the probe 16711001 was used to represent the

318 expression of *CYP2E1* on the y-axis. Each dot was used to represent one individual

319 (two-tailed t-test, *p*-value = 0.125). **B.** The same umbilical cord blood samples were

320 used for measuring *IRS2* expression at the probe 16780917 (two-tailed t-test, *p*-value =

321 0.144). **C.** Representative Westerns blots are shown for the ratio of *IRS2* to *GAPDH*

322 (normalization control) in all 41 placenta samples of ASD and TD comparison with each

323 dot representing one sample (two-tailed t-test, *p*-value = 0.08). A Western blot with 6

324 samples in ASD and 7 samples TD were showed at the left panel. IRS2 protein was  
325 labeled with green fluorescence at 185 kDa and GAPDH was marked with red  
326 fluorescence at 37 kDa.

327

328 ***CYP2E1* but not *IRS2* DMR methylation levels were associated with *cis***  
329 **genotypes.**

330 We performed Sanger sequencing within the *CYP2E1* and *IRS2* ASD DMRs to identify  
331 single nucleotide polymorphisms (SNPs) that could explain some of the methylation  
332 differences. Two SNPs (rs943975, rs1536828) were identified within the boundaries of  
333 the *CYP2E1* DMR in the 41 placenta samples (**Supplementary Table 7**). A significant  
334 association between rs1536828 (but not rs943975) genotype and *CYP2E1* DMR  
335 percent methylation was observed, with samples homozygous for the minor allele (G/G)  
336 showing the lowest methylation (**Fig. 6A**). A single informative SNP (rs9301411) was  
337 also identified within the *IRS2* DMR (**Supplementary Table 7**) but was not significantly  
338 associated with methylation level (**Fig. 6B**).

339

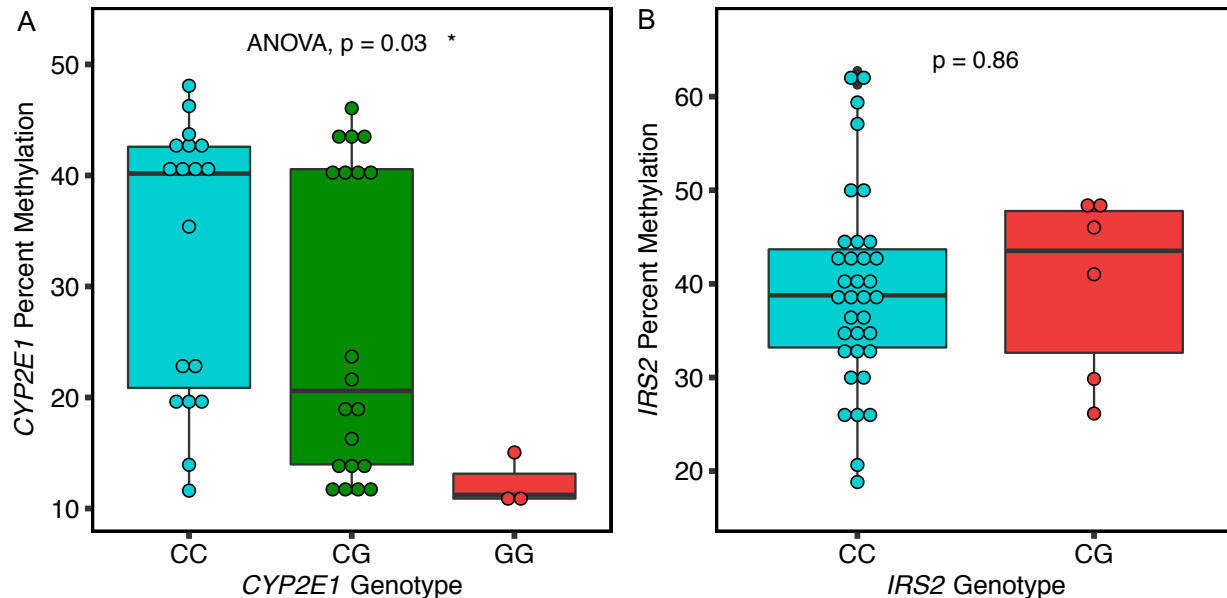

340

341 **Figure 6.** *Cis* genotype was significantly associated with *CYP2E1* but not *IRS2* DMR  
342 methylation levels.

343 **A.** *CYP2E1* genotype at rs1536828 within the ASD DMR was significantly associated  
344 with *CYP2E1* DMR average percent methylation tested by ANOVA ( $p$ -value = 0.03). **B.**  
345 *IRS2* genotype at rs9301411 within the ASD DMR was not significantly associated with  
346 *IRS2* DMR methylation by two-tailed t-test ( $p$ -value = 0.86).

347

348 **Preconception prenatal vitamin use corresponded to protective placental DNA**  
349 **methylation patterns at *CYP2E1*, *IRS2*, and genome-wide.**

350 Placental samples from mothers who took prenatal vitamins during the first month of  
351 pregnancy showed a trend for higher *CYP2E1* DMR methylation that was not  
352 significant, but in the same direction expected for protection from ASD (**Fig. 7A**). At the  
353 *IRS2* DMR, however, there was a significant association with maternal prenatal vitamin  
354 use and lower methylation, also in ASD-protective direction (**Fig. 7B**).

355

356 To further explore the relationship between placental methylation patterns influenced by  
357 prenatal vitamin use in the first month of pregnancy, placental methylomes were  
358 analyzed for DMRs by prenatal vitamin use in the first month of pregnancy (PreVitM1)  
359 with more than 10% methylation difference, and 376 DMRs were identified over 587  
360 genes (**Supplementary Table 8**). 60 genes overlapped between PreVitM1 DMRs and  
361 ASD DMRs in placenta (**Supplementary Table 8, Fig. 7C**). Gene ontology analysis  
362 showed that genes common to PreVitM1 and ASD DMRs were significantly enriched for  
363 functions in neuron fate commitment, transcription regulation, central nervous system  
364 development, and regulation of phosphatidylinositol 3-kinase activity (**Fig. 7D**). We also  
365 separated placental samples based on when mothers started taking prenatal vitamins  
366 during pregnancy into three periods (**Supplementary Table 9**). For the *CYP2E1* DMR,  
367 we found that during all three periods, ASD placental samples showed lower percent  
368 methylation on the *CYP2E1* DMR compared to TD (**Supplementary Fig. 7A**). The  
369 expected opposite finding of higher methylation levels in ASD compared with TD  
370 placental samples was observed at the *IRS2* DMR (**Supplementary Fig. 7B**).

371

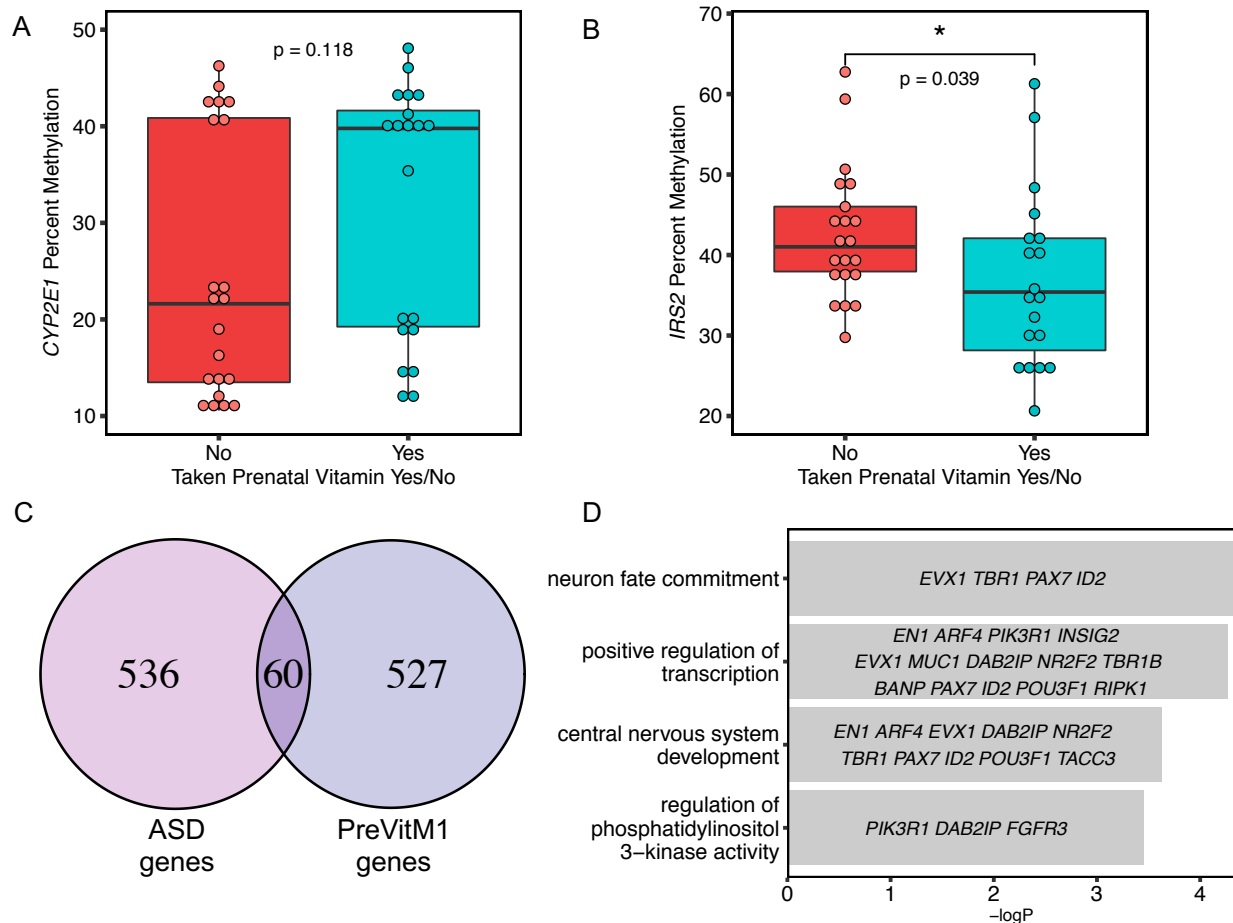

372

373 **Figure 7.** Preconception prenatal vitamin use was a significant modifier of *IRS2*

374 methylation and associated DMRs overlapped ASD DMRs in placenta.

375 For **A** and **B**, the x-axis represents maternal prenatal vitamins use during the first month

376 pf pregnancy, while the y-axis shows the percent methylation. **A.** *CYP2E1* DMR

377 methylation was not significantly altered by P1 prenatal vitamin use, although a trend

378 was observed in the protective direction for ASD (two-tailed t-test,  $p$ -value = 0.118). **B.**

379 Higher percent methylation at *IRS2* DMR was significantly associated with not taking

380 prenatal vitamins at P1 (two-tailed t-test,  $p$ -value = 0.039), which is in the same direction

381 as ASD risk. **C.** DMRs identified based on P1 prenatal vitamins use were associated

382 with 587 genes, which showed a significant overlap with ASD DMR associated genes

383 (Fisher's exact test,  $p$ -value  $< 2.528e-16$ ). **D.** Gene ontology and pathway analysis was  
384 performed on the overlapped gene list (60 genes) (**Supplementary Table 8**) between  
385 placenta ASD DMR and P1 prenatal vitamin DMR associated genes for enrichment by  
386 Fisher's exact test with  $-\log(p\text{-value})$  represented on the x-axis. Genes in each gene  
387 ontology (GO) term are shown within each bar.

388  
389 To further investigate the potential inter-relatedness of diagnosis, prenatal vitamin use,  
390 and *cis* genotype on methylation at *CYP2E1* and *IRS2* DMRs, we calculated  
391 associations between each factor and methylation separately by two-tailed t-test or  
392 ANOVA, as well as two-way diagnosis and PreVitM1; diagnosis and genotype;  
393 genotype and PreVitM1 by Pearson's chi-squared test. These analyses illustrate that  
394 *CYP2E1* genotype and diagnosis significantly contributed to *CYP2E1* DMR methylation,  
395 while PreVitM1 and diagnosis were significantly associated with *IRS2* DMR methylation  
396 (**Fig. 8A, Fig. 8B**). No significant association was found between two-way interactions  
397 among each of the three factors and each DMR methylation level by ANOVA  
398 (**Supplementary Table 10**). When combining *CYP2E1* genotype, PreVitM1, and  
399 diagnosis to predict methylation at the *CYP2E1* DMR, a significant association was  
400 observed on *CYP2E1* DMR methylation with diagnosis and rs1536828 genotype (**Fig.**  
401 **8C, Supplementary Fig. 8A**). At the *IRS2* DMR, PreVitM1 and diagnosis significantly  
402 contributed to *IRS2* DMR methylation (**Fig. 8D, Supplementary Fig. 8B**).

403



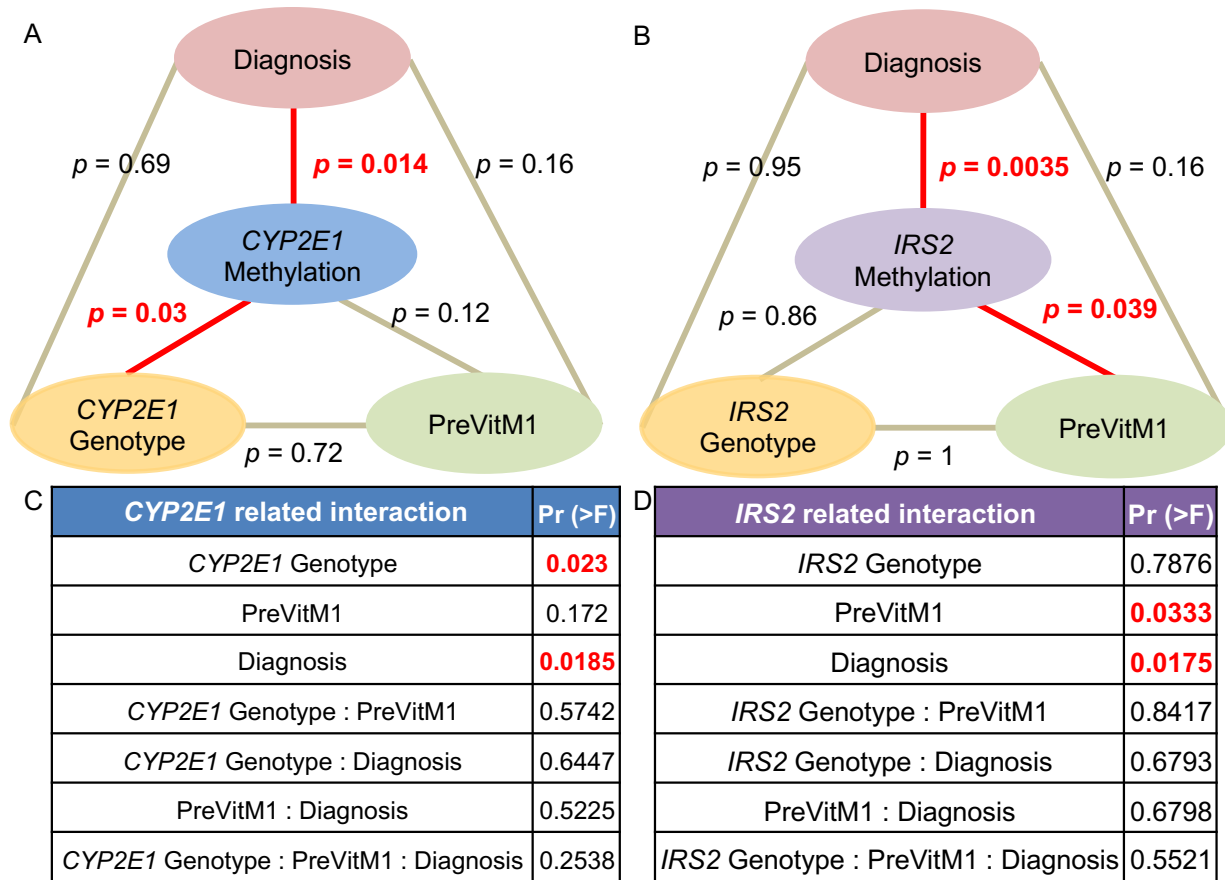

404

405 **Figure 8.** *CYP2E1* and *IRS2* DMR associations and interactions between diagnosis,  
 406 genotype, and preconception prenatal vitamin use.

407 For **A** and **B**, diagnosis, genotype and PreVitM1 variables were tested for association  
 408 with methylation separately by two-tailed t-test (or ANOVA for *CYP2E1* genotype) with  
 409  $p$ -value listed at each line. Between each factor, Pearson's Chi-Squared tests were  
 410 performed with the  $p$ -value listed at each line. Significant associations were shown with  
 411 a bold red line. For **C** and **D**, two-way interactions and three-way interaction were  
 412 considered by using an ANOVA model to test association among three factors,  
 413 diagnosis, genotype, and PreVitM1 to methylation at two genome-wide significant DMR.  
 414 **A.** *CYP2E1* DMR methylation was significantly associated with *CYP2E1* genotype  
 415 (rs1536828) and diagnosis. **B.** *IRS2* DMR methylation was significantly associated with

416 diagnosis and PreVitM1. **C.** There was a significant association on *CYP2E1* genotype  
417 (rs1536828), and diagnosis with *CYP2E1* DMR methylation after considering interaction  
418 terms. **D.** Both diagnosis and PreVitM1 were significantly associated with *IRS2* DMR  
419 methylation with interaction terms considered.  
420

## 421 **Discussion**

422 This study utilized whole methylome analysis of prospectively stored placenta samples  
423 in a high risk ASD cohort to bioinformatically identify novel gene loci that were able to  
424 discriminate child outcome at age three. This unbiased analysis of ASD differentially  
425 methylated regions in placenta tissue resulted in several novel findings. First, the 596  
426 genes identified from 400 placental ASD DMRs significantly overlapped with genetic risk  
427 for ASD from curated databases and gene functions in neurons. Second, two genome-  
428 wide significant placental ASD DMRs at *CYP2E1* and *IRS2* were discovered that were  
429 validated by pyrosequencing and also overlapped with ASD- associated genetic  
430 variation and gene expression changes. Lastly, we investigated genotype and nutrient  
431 factors correlating with methylation at *CYP2E1* and *IRS2*, demonstrating specific effects  
432 for *cis* genotype and diagnosis at *CYP2E1* and prenatal vitamin use at *IRS2*. These  
433 results therefore suggest that DNA methylation patterns in placenta provide a direct link  
434 between genetics, environment, and fetal epigenetic programming, which can reflect  
435 early development relevant to the complex etiology of ASD. The epigenomic signature  
436 of ASD in placenta also provides important insights into gene functions, pathways,  
437 gene-environment interactions, and potential biomarkers that may be useful in  
438 improving early detection of ASD.

439  
440 This study is the first to identify 400 potential ASD DMRs that distinguish between ASD  
441 and TD placenta samples and highlights specific locations and gene functions of  
442 differentially methylation in placental samples from children with ASD. First, these  
443 placental ASD DMRs were highly enriched around transcription start sites and

444 H3K4me3 marks that are clear marks of gene regulatory functions (Carninci et al., 2006;  
445 Koudritsky & Domany, 2008; Portales-Casamar et al., 2007; Yang, Bolotin, Jiang,  
446 Sladek, & Martinez, 2007). Furthermore, gene ontology analysis of the 596 genes  
447 mapped to placental ASD DMRs pointed to enriched gene functions in transcription,  
448 neuron fate, and embryonic development, which were expected based on previous  
449 studies (Dapretto et al., 2006; Geschwind & Levitt, 2007; Schroeder et al., 2016).  
450 Genes with ASD DMRs in both placenta and brain were enriched for Wnt and cadherin  
451 signaling pathways. Wnt signaling is important in embryogenesis, tissue regeneration,  
452 and neurodevelopment (Katoh & Katoh, 2006; Logan & Nusse, 2004; Nusse & Clevers,  
453 2017), while cadherin signaling plays a vital role in connecting major intracellular  
454 signaling pathways with adhesion protein complexes (Klezovitch & Vasioukhin, 2015;  
455 Yap & Kovacs, 2003). Our results therefore complement previous studies that have  
456 shown the importance of Wnt and cadherin pathways in the etiology of ASD (Betancur,  
457 Sakurai, & Buxbaum, 2009; Kalkman, 2012; Krey & Dolmetsch, 2007). We also  
458 replicated our previous finding of differential methylation at *DLL1* in ASD placentas  
459 (Schroeder et al., 2016) (**Supplementary Table 2**). *DLL1* encodes a ligand of Notch,  
460 activated by Wnt signaling (Hofmann et al., 2004).

461  
462 When overlapped with datasets of genetic risk for neurodevelopmental disorders  
463 including ASD and intellectual disability (Abrahams et al., 2013; Iossifov et al., 2014;  
464 Sanders et al., 2015), placenta ASD DMRs were significantly enriched for ASD but not  
465 for intellectual disability genetic risk, illustrating the specificity of the ASD DMRs  
466 identified in our study. The highest overlap of ASD DMR associated genes was with the

467 SFARI high confidence genes, including *KMT2A*, *MYT1L*, and *TBR1* (Abrahams et al.,  
468 2013). *KMT2A* is expressed in brain and placenta and encodes for a transcriptional  
469 coactivator (lysine methyltransferase 2A) that modulates H3K4 methyltransferase  
470 activity, specifically the transfer of methyl groups from S-adenosylmethionine to lysine  
471 residues on histones (Allis et al., 2007; Shilatifard, 2008) and has been previously  
472 implicated in brain development (E. Shen, Shulha, Weng, & Akbarian, 2014; Vallianatos  
473 & Iwase, 2015). *MYT1L* encodes for zinc finger transcription factor that functions in the  
474 developing mammalian central nervous system and is associated with  
475 neurodevelopmental disorders (Blanchet et al., 2017; Wang et al., 2010). *TBR1* (T-box,  
476 brain, 1) is a transcription factor which is vital for vertebrate embryo development,  
477 neuron migration and differentiation (Bedogni et al., 2010; Englund et al., 2005). In  
478 addition, our two genome-wide significant ASD DMR associated genes, *CYP2E1* and  
479 *IRS2*, were both on the list of “high confidence” genetic risk for ASD (Sanders et al.,  
480 2015).

481  
482 Four genes were found to be in common between placenta ASD DMRs, brain ASD  
483 DMRs and SFARI genetic risk, specifically *GADD45B*, *MC4R*, *PCDH9* and *TBL1XR1*  
484 (Betancur et al., 2009; Garbett et al., 2008; Orlik & Halawa, 2016; Tabet et al., 2014).  
485 *GADD45B* (growth arrest and DNA-damage-inducible, beta) responds to environmental  
486 stress through JNK pathway induced DNA demethylation of neurogenesis and synaptic  
487 plasticity at gene promoters (Garbett et al., 2008; Ma et al., 2009; Sultan, Wang, Tront,  
488 Liebermann, & Sweatt, 2012). *MC4R* encodes the membrane-bound melanocortin 4  
489 receptor, implicated in hormone and cell growth pathways in obesity and insulin

490 resistance (Chambers et al., 2008; Orlik & Halawa, 2016; Yeo et al., 1998). *PCDH9*  
491 (protocadherin 9) is a cadherin signaling pathway gene with specific signaling function  
492 at neuronal synaptic junctions (Betancur et al., 2009; Bruining et al., 2015). *TBL1XR1*  
493 encodes the nuclear receptor corepressor transducing beta like 1 X-linked receptor 1  
494 that binds to histone deacetylase 3 (HDAC 3) complexes in neuron development  
495 (Gonzalez-Aguilar et al., 2012; Pons et al., 2015; Tabet et al., 2014). A GWAS noise  
496 reduction (GWAS-NR) method to correct for false-positive association with ASD  
497 identified cadherin and signaling transduction pathways that included *PCDH9* and *IRS2*  
498 as high confidence ASD genes (Hussman et al., 2011).

499  
500 Our study identified novel methylation differences at *CYP2E1* and *IRS2*, which exhibited  
501 genome-wide significant differences between ASD and TD. Both *CYP2E1* and *IRS2* are  
502 identified as ASD genetic risk genes in multiple databases related to ASD genetic risk  
503 across different tissues and populations (Vogel Ciernia et al., 2018; Sanders et al.,  
504 2015). Both *CYP2E1* and *IRS2* DMRs are located close to the TSS site at CpG shore  
505 intragenic regions, which is also consistent with the enrichment for TSS flanking regions  
506 and H3K4me3 promoter marks in the 400 ASD DMRs. These results are consistent with  
507 the developmental dynamics of H3K4me3 marks in human prefrontal cortex, which have  
508 been observed to be altered in ASD (Cheung et al., 2010; Shulha et al., 2012).  
509 Structural variants and SNPs in cis-regulatory elements also showed significant  
510 contribution to ASD (Brandler et al., 2018; W. Sun et al., 2016).

511

512 *CYP2E1* encodes a member of the cytochrome P450 superfamily that is involved in the  
513 metabolism of drugs, including analgesics like acetaminophen, fatty acids such as  
514 arachidonic acid, and a range of chemical toxins, including halogenated hydrocarbons,  
515 benzene, and its activity is inducible by drugs, alcohol, and xenobiotics. It thus has an  
516 important role in drug bioavailability (Gonzalez, 1988; Koop, 1992; Rasheed, Hines, &  
517 McCarver-May, 1996; Traglia et al., 2017). Previous studies showed those proteins  
518 essential for embryonic development in human, rat and zebrafish (Jukka Hakkola et al.,  
519 1996; S. M. Jones, Boobis, Moore, & Stanier, 1992; Kishida & Callard, 2001; Ko, Choi,  
520 Green, Simmen, & Simmen, 1994; Majdic, Sharpe, O'Shaughnessy, & Saunders, 1996).  
521 We observed a significant association between methylation and *cis* genotype at the  
522 *CYP2E1* DMR, a finding which is consistent with the identification of this locus in a  
523 screen for human metastable epialleles variability between individuals (Silver et al.,  
524 2015). In addition, in immune models of ASD, maternal interleukin-6 (IL6) crosses the  
525 placenta, disrupting development of hippocampal spatial learning (Boksa, 2010;  
526 Jonakait, 2007; Krakowiak et al., 2012). Previous studies showed that IL6 inhibits  
527 *CYP1A1*, *CYP1A2* and *CYP2E1* expression (Abdel-Razzak et al., 1993; J. Hakkola, Hu,  
528 & Ingelman-Sundberg, 2002; Jover, Bort, Gómez-Lechón, & Castell, 2002; Patel et al.,  
529 2014), consistent with the lower methylation and expression levels in ASD versus TD  
530 observed in our study. In addition, *CYP2E1* expression is transcriptionally regulated by  
531 the JAK2/STAT3 pathway, providing a potential convergent pathway with *IRS2* (**Fig. 9**)  
532 (Patel et al., 2014).  
533

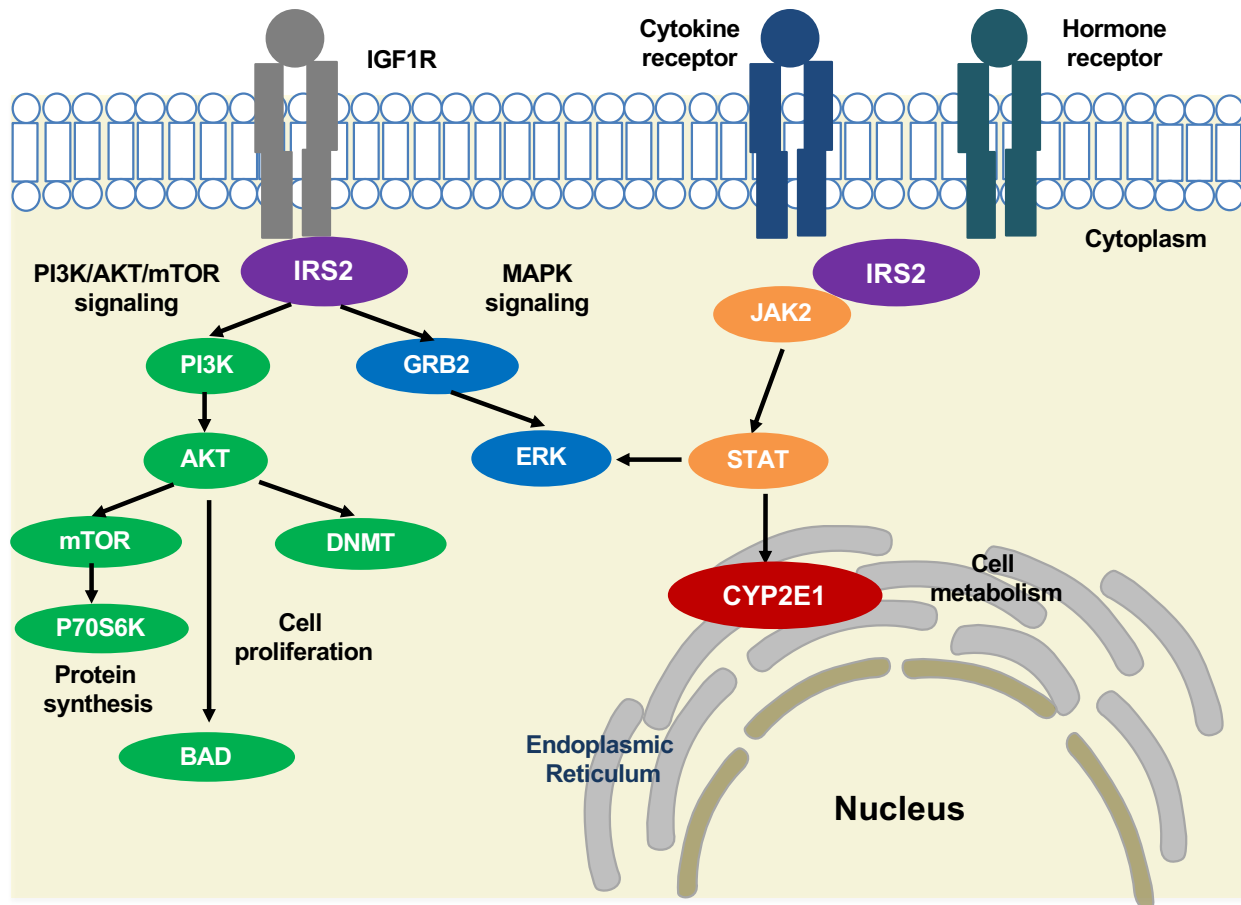

534

535 **Figure 9.** Potential pathway convergence of proteins encoded by both ASD DMRs.

536 IRS2 interacts with transmembrane protein insulin-like growth factor receptor (IGF1R) at  
537 the intracellular membrane, resulting in activation of the PI3K/AKT/mTOR and MAPK  
538 signaling pathways (Machado-Neto et al., 2018) involved in protein synthesis, cell  
539 proliferation and gene expression (Archuleta et al., 2009; Machado-Neto et al., 2018;  
540 Patti et al., 1995; Tamburini et al., 2008; Velloso et al., 1996). An AKT-mediated  
541 ubiquitin pathway leads to *de novo* DNA methylation changes by DNMT (FANG et al.,  
542 2015; Lin & Wang, 2014). IRS2 also interacts with cytokine and hormone receptors and  
543 induces JAK2/STAT3 signaling (Carvalho et al., 2003; Machado-Neto et al., 2018;  
544 Saad et al., 1996, 1995). STAT activation leads to *CYP2E1* localization at the  
545 endoplasmic reticulum, changing cellular metabolism (Patel et al., 2014).



546  
547 *IRS2* encodes for insulin receptor substrate 2, a cytoplasmic signaling molecule that  
548 mediates the effects of insulin and insulin-like growth factor 1 (*IGF1*) (Park et al., 2016;  
549 Withers et al., 1998) and cytokine receptors (Ihle, 1995; Rui, Yuan, Frantz, Shoelson, &  
550 White, 2002; X. J. Sun et al., 1995). *IRS2* has a phosphotyrosine-binding domain which  
551 contributes to the intracellular affinity to cell membrane receptors (**Fig. 9**) (Eck, Dhe-  
552 Paganon, Trüb, Nolte, & Shoelson, 1996; Machado-Neto, de Melo Campos, & Traina,  
553 2018; Schlessinger & Lemmon, 2003; White, 1998). PI3K/AKT/mTOR and MAPK  
554 signaling pathways are linked with *IRS2* in the regulation of protein synthesis and cell  
555 proliferation (Archuleta et al., 2009; Machado-Neto et al., 2018; Patti et al., 1995;  
556 Tamburini et al., 2008; Velloso et al., 1996). When activated by cytokine and hormone  
557 receptors, *IRS2* stimulates JAK2, leading to STAT and MAPK signaling activation  
558 (Carvalho, Ribeiro, Folli, Velloso, & Saad, 2003; Machado-Neto et al., 2018; Saad,  
559 Carvalho, Thirone, & Velloso, 1996; Saad, Velloso, & Carvalho, 1995; Velloso et al.,  
560 1996). The insulin-like growth factors (*IGF1*) pathway, which includes *IRS2*, also  
561 mediates *de novo* DNA methylation by DNA methyltransferase (DNMT) through AKT  
562 (Fang et al., 2015; Lin & Wang, 2014). This pathway may explain why methylation at the  
563 *IRS2* DMR was sensitive to maternal prenatal vitamin intake, since *IRS2* stimulates the  
564 mTOR (mechanistic target of rapamycin) pathway, which responds to nutrients and  
565 growth factors signaling to regulate protein synthesis (Gulati & Thomas, 2007; M.  
566 Laplante & Sabatini, 2013; Mathieu Laplante & Sabatini, 2012; Shimobayashi & Hall,  
567 2014). Previous studies have shown that maternal folate alters amino acid transport  
568 activity in the placenta, resulting in affecting fetal growth by the mTOR signaling

569 pathway (Huang & Fingar, 2014; Shimobayashi & Hall, 2014). Our analysis shown that  
570 placental differentially methylated gene loci associated with prenatal vitamin intake were  
571 also highly enriched for functions in fetal growth and development. We showed that high  
572 *IRS2* methylation is significantly associated with ASD and mothers who did not take  
573 prenatal vitamins before conception, suggesting that sufficient folate levels around  
574 placental implantation may be protective for ASD through *IRS2*-mTOR signal  
575 transduction. The link between epigenetic alterations in *IRS2* and risk for ASD is  
576 particularly intriguing given a growing body of epidemiologic evidence demonstrating  
577 higher ASD risk in offspring born to mothers who experienced diabetes during  
578 pregnancy, including some very large and methodologically sound studies with clinical  
579 diagnoses of both maternal diabetes and child ASD (Li et al., 2016; Xiang et al., 2018;  
580 G. Xu, Jing, Bowers, Liu, & Bao, 2014).

581  
582 We did not observe any significant associations between other potential cofounders  
583 such as maternal age, pregnancy BMI, or gestational age at birth and ASD diagnosis in  
584 the MARBLES study (Schmidt et al., 2016). Cell type heterogeneity in the placenta may  
585 complicate the interpretation of our results, however, our previous study did not detect  
586 differences in methylation levels by placental region at specific gene loci (Schroeder et  
587 al., 2016). Other potential limitations of our study include the relatively small sample  
588 size and sequencing depth. This study serves as a proof-of-principle that placenta  
589 methylation patterns detected by WGBS may be informative in ASD. Replication with  
590 additional samples, other similar prospective cohorts, and improved sequencing and  
591 bioinformatic strategies will be important in future studies.

592

593 In conclusion, we identified two high confidence genes differentially methylated in ASD  
594 from an unbiased analysis of DNA methylation in placenta from high-risk pregnancies  
595 and investigated possible genetic and environmental modifiers of methylation at both  
596 loci. Methylation levels at the *CYP2E1* DMR were associated with genotype, while the  
597 methylation levels at the *IRS2* DMR were associated with prenatal vitamin use. Our  
598 results are consistent with a previous study using the Illumina 450K array, which  
599 showed that both genetic and environmental effects influence DNA methylation levels  
600 (Hannon et al., 2018). Placenta reflects the essential interface between the fetus and  
601 mother, mediating the impacts of endocrine and growth factors in the maternal  
602 environment on fetal development (Koukoura, Sifakis, & Spandidos, 2012; Zeltser &  
603 Leibel, 2011). Both *CYP2E1* and *IRS2* are related to protein synthesis, cell proliferation,  
604 and cell metabolism, consistent with previous studies of convergent gene pathways in  
605 ASD (Vogel Ciernia et al., 2018; Sanders et al., 2015; Voineagu et al., 2011; Xu et al.,  
606 2012; Zhang et al., n.d.). These results therefore provide evidence that placental  
607 methylation levels reflect the intersection of genetic and environmental risk and  
608 protective factors that are expected to be useful for early intervention and prevention of  
609 ASD.

610

## 611 **Materials and Methods**

### 612 **MARBLES study design, sample selection, and DNA isolation**

613 The Markers of Autism Risk in Babies: Learning Early Signs (MARBLES) study design  
614 was described in a previous publication (Hertz-Picciotto et al., 2018). In MARBLES,  
615 mothers of at least one child with confirmed ASD who were pregnant or planning a  
616 pregnancy were recruited in the Northern California area. Inclusion criteria for the study  
617 were: 1) mother or father has one or more biological child(ren) with ASD; 2) mother is  
618 18 years or older; 3) mother is pregnant; 4) mother speaks, reads, and understands  
619 English sufficiently to complete the protocol and the younger sibling will be taught to  
620 speak English; 5) mother lives within 2.5 hours of the Davis/Sacramento, California  
621 region at time of enrollment. With shared genetics, the next child has a 15-fold higher  
622 risk for developing ASD compared to the general population (Hertz-Picciotto et al.,  
623 2018). Demographic, diet, lifestyle, environmental, and medical information were  
624 prospectively collected through telephone-assisted interviews and mailed  
625 questionnaires throughout pregnancy and the postnatal period. Infants received  
626 standardized neurodevelopmental assessments beginning at 6 months and concluding  
627 at 3 years of age (Hertz-Picciotto et al., 2018). Diagnostic assessments at 3 years  
628 included the gold standard Autism Diagnostic Observation Schedule (ADOS) (Lord,  
629 Risi, Lambrecht, Cook Jr, et al., 2000; Lord, Risi, Lambrecht, Cook, et al., 2000), the  
630 Autism Diagnostic Interview-Revised (ADI-R) (Lord, Rutter, & Le Couteur, 1994), and  
631 the Mullen Scales of Early Learning (MSEL) (Mullen, 1995). Participants were classified  
632 into outcome groups including ASD and Typical Development (TD), based on a  
633 previously published algorithm that uses ADOS and MSEL scores (Chawarska et al.,

634 2014; Ozonoff et al., 2014). Children with ASD outcomes have scores over the ADOS  
635 cutoff and meet DSM-5 criteria for ASD. Children with TD outcomes have all MSEL  
636 scores within 2.0 SD and no more than one MSEL subscale that is 1.5 SD below the  
637 normative mean and scores on the ADOS at least three more points below the ASD  
638 cutoff. This study utilized 41 male MARBLES placenta samples, including 20 samples  
639 from children later diagnosed with ASD and 21 children determined to have TD,  
640 matched for enrollment time frame and date of birth. DNA was isolated from 50-100 mg  
641 frozen placental tissues (20 ASD and 21 TD) using the Genra Puregene tissue kit  
642 (Qiagen).

643

#### 644 **Whole Genome Bisulfite Sequencing (WGBS)**

645 Raw sequencing data (fastq files) were published previously (Schroeder et al., 2016).  
646 Briefly, WGBS libraries were made with the sonicated genomic DNA (around 300 bp)  
647 and ligated with methylated Illumina adapters using NEB's NEBNext DNA library prep  
648 kit (Schroeder et al., 2013, 2016). The library was bisulfite converted using EZ DNA  
649 Methylation lighting kit (Zymo), amplified for 12 cycles using PfuTurbo Cx Hotstart DNA  
650 Polymerase (Agilent) and purified with Agencourt AMPure XP Beads (Beckman  
651 Coulter). The quality and quantity of libraries were measured on a Bioanalyzer (Agilent)  
652 and sequenced on Illumina HiSeq 2000 with each sample per single lane. Reads after  
653 trimming were uniquely mapped to human reference genome (hg38) as described  
654 previously using BS-Seeker2 on average 1.6X genome converge with 99.3% bisulfite  
655 conversion efficiency (measured through the percentage of non-CpG cytosines that  
656 were unconverted) (Dunaway et al., 2016; Guo et al., 2013; Schroeder et al., 2013).

657

658 **ASD Differentially Methylated Regions (DMRs) and genome-wide significant**

659 **DMRs**

660 DMRs were called as described in previous publications (Coulson et al., 2018; Dunaway

661 et al., 2016; Mordaunt, Shibata, et al., 2018) using the default settings. In this case,

662 each ASD DMR contained greater than 10% methylation difference between ASD and

663 TD samples at least three CpGs within 300 base pairs (bp) and a  $p$ -value  $< 0.05$ .

664 Background regions were defined using the same conditions as DMRs but without any

665 percent methylation filters to identify all possible DMR locations based on CpG density

666 and sample sequencing coverage. Hypermethylated ASD DMRs were defined as higher

667 percent methylation in ASD versus TD, while hypomethylated ASD DMRs were

668 defined as lower percent methylation in ASD versus TD samples. Genome-wide,

669 significant DMRs were identified based on a family-wide error rate (FWER)  $< 0.05$ ,

670 determined by permuting the samples 1000 times by chromosome, and counting the

671 number of null permutations with equal or better DMRs ranked by number of CpGs and

672 areaStat (Box, 1980).

673

674 **Hierarchical clustering and principal component analysis (PCA)**

675 Methylation was extracted at each ASD DMR for every sample. Percent methylation of

676 each sample was normalized to the mean methylation of each ASD DMR. ASD DMRs

677 were grouped by Ward's Method of hierarchical clustering (Wilks, 2011). Principal

678 component analysis was performed on methylation at all ASD DMRs across all samples

679 using the `prcomp` function and `ggbiplot` package in R. The ellipses for each group were

680 illustrated as the 95% confidence interval. The lack of overlapping ellipses for ASD and  
681 TD samples indicated significant methylation difference in ASD DMRs between groups  
682 ( $p < 0.05$ ).

683

#### 684 **Assignment of DMRs to genes and relative location to TSS**

685 Genes were assigned to DMRs using the Genomics Regions Enrichment of Annotations  
686 Tool (GREAT) on the default association settings (5.0 kilo-base (kb) upstream and 1.0  
687 kb downstream, up to 1000.0 kb max extension) (McLean et al., 2010). The distance  
688 (kb) was calculated from the ASD DMRs, hypermethylated ASD DMRs, hypomethylated  
689 ASD DMRs and background regions to transcription start site (TSS) of the GREAT  
690 assigned gene. The gene length was calculated for both placental ASD DMR genes and  
691 all genes in human genome and tested for potential distribution differences by  
692 Pearson's chi-squared test.

693

#### 694 **Gene Ontology Term and Pathway Enrichment Analysis**

695 Gene ontology (GO) analysis was done using PANTHER (Protein Analysis Through  
696 Evolutionary Relationships) overrepresentation test, with the GO Ontology database  
697 (Ashburner et al., 2000; The Gene Ontology Consortium, 2017) and Fisher's exact test  
698 with false discovery rate (FDR) multiple test correction. GO term enrichments were  
699 presented by the hierarchical terms rather than specific subclass functional classes, as  
700 described previously (Mi, Muruganujan, & Thomas, 2012; Thomas et al., 2003).

701

#### 702 **Tests for ASD DMR Enrichments**

703 All tests of enrichment for ASD DMRs were compared to a set of all possible  
704 background regions that are calculated in the DMR analysis pipeline. Enrichment tests  
705 for placenta ASD DMRs associated genes and published gene lists were done using the  
706 GeneOverlap R package which implements Fisher's exact test and adjusted for FDR  
707 correction (L. Shen et al., 2013). \* $p < 0.05$ , \*\* $p < 0.01$ , \*\*\* $p < 0.001$  by Fisher's exact  
708 test with FDR corrected. Brain cortex (BA9) ASD DMRs were defined as either a 5% or  
709 10% methylation difference between ASD and TD and were described previously using  
710 the same method as placenta ASD DMRs (Vogel Ciernia et al., 2018). The SFARI  
711 (Simons Foundation Autism Research Initiative) database was used for the five  
712 categories of ASD risk genes (<https://gene.sfari.org/database/gene-scoring/>) (Abrahams  
713 et al., 2013). High effect ASD risk gene lists were also identified from Sanders *et al.*  
714 (Sanders et al., 2015). Likely gene-disrupting (LGD) recurrent ASD mutations and  
715 missense mutation on *de novo* mutations were obtained from Iossifov *et al.* (Iossifov et  
716 al., 2014). Gene lists on intellectual disability (ID) were obtained from Gilissen *et al.*  
717 (Gilissen et al., 2014). Alzheimer's disease GWAS gene lists were extracted from SNPs  
718 showing association with Alzheimer's disease ( $P \leq 1 \times 10^{-3}$ ) (Harold et al., 2009). Lung  
719 cancer GWAS gene lists were acquired from Landi *et al.* (Landi et al., 2009). The  
720 random genes category contains the same number of regions as the placenta ASD  
721 DMRs to serve as a specificity control. ASD DMRs were examined for enrichment with  
722 known chromatin marks compared to the background using LOLA R package with two-  
723 tailed Fisher's exact test after FDR correction (Sheffield & Bock, 2016). Placenta  
724 histone marks H3K4me1, H3K4me3, H4K9me3, H3K36me3, H3K27me3 and H3K27ac  
725 were extracted from ENCODE (Encyclopedia of DNA Elements) placenta ChIP-seq



726 dataset (ENCODE Project Consortium, 2012; Sloan et al., 2016). ASD DMRs were also  
727 analyzed for overlap with chromatin states predicted by chromHMM, which use histone  
728 modification ChIP-seq data to separate the genome into 15 functional states in the  
729 Roadmap Epigenomics Project using a Hidden Markov Model (Ernst & Kellis, 2017;  
730 Kundaje et al., 2015). For promoters, chromHMM separates active transcription start  
731 site (TssA), TSS flank (TssAFlnk), bivalent TSS (TssBiv), and bivalent TSS flank  
732 (BivFlnk) states. For enhancers, genic enhancer (EnhG), enhancer (Enh), and bivalent  
733 enhancer (EnhBiv) are the different states. Human CpG island locations were extracted  
734 from UCSC genome browser (Kent et al., 2002). CpG island shores were defined as 2  
735 kb flanking regions on both sides of CpG island. CpG island shelf was characterized as  
736 2 kb flanking regions on both sides of CpG island shore, not including CpG island or  
737 CpG island shore. CpG island “open sea” includes all genomic regions except CpG  
738 island, CpG island shore and CpG island shelf. A custom R script was used to generate  
739 the locations of CpG islands (<https://github.com/Yihui-Zhu/AutismPlacentaEpigenome>).

740

#### 741 **Pyrosequencing**

742 Genomic DNA (500 ng) was bisulfite converted using the EZ DNA Methylation kit  
743 (Zymo). Amplification and sequencing primers were designed using the PyroMark  
744 Assay Design Software 2.0 (Qiagen). DMRs were amplified using the PyroMark PCR kit  
745 (Qiagen). Pyrosequencing of 13 CpG sites at *CYP2E1* gene, and 11 CpG sites in  
746 human *IRS2* gene was performed in triplicate. Pyrosequencing was performed on a  
747 Pyromark Q24 Pyrosequencer (Qiagen) with the manufacturers recommended protocol.

748 Enzyme, substrate, and dNTPs were from the Pyromark Gold Q24 Reagents (Qiagen)  
749 and the methylation levels were analyzed using Pyromark Q24 software.

750

751 *CYP2E1* related DMR pyrosequencing primers:

752 Forward: GGTGTTTTGTTTTGGGGTTGA

753 Reverse: ACCCATTCAATATTCACAACAATC (5' Biotin)

754 Sequencing: GGTTGATGATGGGGA

755 Amplification region: chr10: 133527817 – 133527938 (hg38)

756

757 *IRS2* related DMR pyrosequencing primers:

758 Forward: TTAGGAATATAGGGAAAGGTGAAAGT

759 Reverse: CCACCCATTCACCCATTCTA (5' Biotin)

760 Sequencing: GGGAAAGGTGAAAGTT

761 Amplification region: chr13: 109781623 – 109781794 (hg38)

762

### 763 **Gene Expression in Umbilical Cord Blood**

764 Data for gene expression assessed by Affymetrix Human Gene 2.0 array were  
765 extracted a previous publication on umbilical cord blood from subjects in the MARBLES  
766 study (GEO ID: GSE123302) (Mordaunt, Park, et al., 2018). Placenta and cord blood  
767 were collected at the same time period in the same study. Raw intensity values from  
768 cord blood samples were normalized by RMA and data from 70 male samples were  
769 extracted, including 30 ASD and 40 TD samples. Normalized expression was examined  
770 at the only probe annotated to *CYP2E1* (16711001) and the only probe annotated to

771 *IRS2* (16780917). Analysis was done on those two probes with 70 samples on the  
772 normalized matrix data.

773

#### 774 **Western Blot**

775 In Western blot experiments, placental proteins were isolated with RIPA buffer  
776 containing 10mM Tris-Cl (pH 8.0), 1mM EDTA, 1% Triton X-100, 0.1% sodium  
777 deoxydholate, 0.1% SDS, 140mM NaCl, 1mM PMSF and complete protease inhibitors  
778 (ThermoFisher), incubated at 37°C for 30 minutes, sonicated and heated at 95°C for 5  
779 min. BCA (Bicinchoninic Acid) protein assay (ThermoFisher) was used to determine  
780 protein concentration. Protein samples (20-30 ug) were resolved on 4-20% tris-glycine  
781 polyacrylamide gels (Biorad). Proteins were separated and transferred to nitrocellulose  
782 membranes for 60 minutes at a constant voltage of 100. The membranes were blocked  
783 in Odyssey Blocking Buffer (PBS) (Licor, 927-40000) for 40 min. Anti-*IRS2* (1:5,000,  
784 Cell Signaling, 3089S) and anti-GAPDH (1:10,000, Advanced Immunochemical, Inc., 2-  
785 RGM2) were incubated with the membrane with Odyssey Blocking Buffer containing  
786 0.2% Tween overnight at 4°C. Membranes were washed with 1 X PBS (Phosphate-  
787 buffered saline) containing 0.2% Tween and then incubated with secondary antibodies,  
788 IRDye 800CW Donkey anti-Mouse IgG (1:50,000, Licor, 926-32212) and IRDye 680RD  
789 Donkey anti-Rabbit IgG (1:50,000, Licor, 926-68073) for 1 hour. Membranes were  
790 scanned using a Licor Odyssey infrared imaging system based on the manufacturer's  
791 guidance (with resolution: 84; quality: medium, 600-channel: 6; 800-channel: 5).  
792 Relative protein quantification was done using the ImageJ software program (Rueden et  
793 al., 2017; Schneider, Rasband, & Eliceiri, 2012) in densitometry mode. *IRS2* signals

794 were normalized to GAPDH (Glyceraldehyde 3-phosphate dehydrogenase) for each  
795 sample.

796

### 797 **Sanger Sequencing**

798 PCR amplification was performed on each sample using PCR 10x buffer, 25 mM MgCl<sub>2</sub>,  
799 5 M betaine, 10 mM dNTPs, DMSO, and HotStart Taq (Qiagen). Each PCR program  
800 was unique to the region being amplified with specific primers. The PCR product was  
801 then resolved by gel electrophoresis using a 1% Agarose gel in 1 X TE to later be  
802 extracted using the gel extraction kit (Qiagen) based on the default protocol. After DNA  
803 quantitation by NanoDrop, the samples were sent to the UC Davis Sequencing Facility  
804 for sequencing on the 3730 Genetic Analyzer (Applied Biosystems Prism) with DNA  
805 sequencing Analysis software v.5.2 (Applied Biosystems Prism). The sequencing  
806 results were assembled and analyzed using CodonCode Aligner version 7.0  
807 (CodonCode).

808

809 *CYP2E1* related SNP (rs943975, rs1536828) primers:

810 Forward: CTACAAGGCGGTGAAGGAAG

811 Reverse: CCCATCCCCATAAACTCTCC

812

813 *IRS2* related SNP (rs943975) primers:

814 Forward: TTAGGAATATAGGGAAAGGTGAAAGT

815 Reverse: CCACCCATTACCCATTCTA

816

817 **Maternal Prenatal Vitamin Use and Timing**

818 Maternal prenatal vitamin information and timing of maternal intake for 6 months before  
819 and each month during the pregnancy were recorded though telephone interviews  
820 and/or questionnaires as previously describes (Hertz-Picciotto et al., 2018). Mothers  
821 who took prenatal vitamins in the first month pregnancy or not were grouped into  
822 PreVitM1 Yes/No. Mothers who took prenatal vitamins beginning from 6 months to 2  
823 months before pregnancy were grouped as “Before Pregnancy”. Mothers beginning  
824 prenatal vitamins one month before pregnancy through the second month of pregnancy  
825 were grouped as “Near Conception”. Mothers beginning prenatal vitamins from 3  
826 months to 9 months of pregnancy were grouped as “During Pregnancy”.

827

828 **Code availability:**

829 Custom scripts for WGBS analysis are available at  
830 [https://github.com/kwdunaway/WGBS\\_Tools](https://github.com/kwdunaway/WGBS_Tools) with the instructions. Custom Scripts for  
831 DMR finder are available at <https://github.com/cemordaunt/DMRfinder> with the  
832 instructions. The rest of code and scripts for each figure and tables are available at  
833 <https://github.com/Yihui-Zhu/AutismPlacentaEpigenome>.

834

835 **Data availability:**

836 WGBS data were previously published, Gene Expression Omnibus (GEO) accession  
837 number GSE67615 (Schroeder et al., 2016). The rest of the relevant data and  
838 information are included in supplementary tables.

839

840 **Acknowledgements:**

841 We would like to thank members of the LaSalle lab and UCD Children's Center for  
842 Environmental Health for helpful discussions, and the MARBLES study participants.

843 This work used the Vincent J. Coates Genomics Sequencing Laboratory at UC

844 Berkeley, supported by NIH S10 Instrumentation Grants S10RR029668 and

845 S10RR027303. This work was supported by R01 ES025574, NIH R01ES021707, NIH

846 P01ES011269 (CCEH), EPA 83543201 (CCEH), DOD AR110194, R01ES020392

847 (MARBLES), U54HD079125 (IDDR), P30ES023513 (EHSC) and NIH-UL1-TR000002

848 (CTSC).

849

850 **Competing interests:**

851 The authors declared they do not have anything to disclose regarding funding or conflict  
852 of interest with respect to this manuscript.

853

854

855 **Reference**

- 856 Abdel-Razzak, Z., Loyer, P., Fautrel, A., Gautier, J. C., Corcos, L., Turlin, B., ...  
857 Guillouzo, A. (1993). Cytokines down-regulate expression of major cytochrome P-  
858 450 enzymes in adult human hepatocytes in primary culture. *Molecular*  
859 *Pharmacology*, 44(4), 707–15. Retrieved from  
860 <http://www.ncbi.nlm.nih.gov/pubmed/8232220>
- 861 Abrahams, B. S., Arking, D. E., Campbell, D. B., Mefford, H. C., Morrow, E. M., Weiss,  
862 L. A., ... Packer, A. (2013). SFARI Gene 2.0: a community-driven knowledgebase  
863 for the autism spectrum disorders (ASDs). *Molecular Autism*, 4(1), 36.  
864 <https://doi.org/10.1186/2040-2392-4-36>
- 865 Allis, C. D., Berger, S. L., Cote, J., Dent, S., Jenuwien, T., Kouzarides, T., ... Zhang, Y.  
866 (2007). New Nomenclature for Chromatin-Modifying Enzymes. *Cell*, 131(4), 633–  
867 636. <https://doi.org/10.1016/J.CELL.2007.10.039>
- 868 Archuleta, T. L., Lemieux, A. M., Saengsirisuwan, V., Teachey, M. K., Lindborg, K. A.,  
869 Kim, J. S., & Henriksen, E. J. (2009). Oxidant stress-induced loss of IRS-1 and  
870 IRS-2 proteins in rat skeletal muscle: Role of p38 MAPK. *Free Radical Biology and*  
871 *Medicine*, 47(10), 1486–1493.  
872 <https://doi.org/10.1016/J.FREERADBIOMED.2009.08.014>
- 873 Aryee, M. J., Jaffe, A. E., Corrada-Bravo, H., Ladd-Acosta, C., Feinberg, A. P., Hansen,  
874 K. D., & Irizarry, R. A. (2014). Minfi: a flexible and comprehensive Bioconductor  
875 package for the analysis of Infinium DNA methylation microarrays. *Bioinformatics*,  
876 30(10), 1363–1369. <https://doi.org/10.1093/bioinformatics/btu049>
- 877 Ashburner, M., Ball, C. A., Blake, J. A., Botstein, D., Butler, H., Cherry, J. M., ...  
878 Sherlock, G. (2000). Gene Ontology: tool for the unification of biology. *Nature*  
879 *Genetics*, 25(1), 25–29. <https://doi.org/10.1038/75556>
- 880 Baio, J., Wiggins, L., Christensen, D. L., Maenner, M. J., Daniels, J., Warren, Z., ...  
881 Dowling, N. F. (2018). Prevalence of Autism Spectrum Disorder Among Children  
882 Aged 8 Years — Autism and Developmental Disabilities Monitoring Network, 11  
883 Sites, United States, 2014. *MMWR. Surveillance Summaries*, 67(6), 1–23.  
884 <https://doi.org/10.15585/mmwr.ss6706a1>
- 885 Bedogni, F., Hodge, R. D., Elsen, G. E., Nelson, B. R., Daza, R. A. M., Beyer, R. P., ...  
886 Hevner, R. F. (2010). Tbr1 regulates regional and laminar identity of postmitotic  
887 neurons in developing neocortex. *Proceedings of the National Academy of*  
888 *Sciences of the United States of America*, 107(29), 13129–34.  
889 <https://doi.org/10.1073/pnas.1002285107>
- 890 Betancur, C., Sakurai, T., & Buxbaum, J. D. (2009). The emerging role of synaptic cell-  
891 adhesion pathways in the pathogenesis of autism spectrum disorders. *Trends in*  
892 *Neurosciences*, 32(7), 402–412. <https://doi.org/10.1016/J.TINS.2009.04.003>
- 893 Blanchet, P., Bebin, M., Bruet, S., Cooper, G. M., Thompson, M. L., Duban-Bedu, B., ...  
894 McNeill, A. (2017). MYT1L mutations cause intellectual disability and variable  
895 obesity by dysregulating gene expression and development of the neuroendocrine  
896 hypothalamus. *PLoS Genetics*, 13(8). <https://doi.org/10.1371/journal.pgen.1006957>
- 897 Boksa, P. (2010). Effects of prenatal infection on brain development and behavior: A  
898 review of findings from animal models. *Brain, Behavior, and Immunity*, 24(6), 881–  
899 897. <https://doi.org/10.1016/J.BBI.2010.03.005>
- 900 Bourgeron, T. (2015). From the genetic architecture to synaptic plasticity in autism



- 901 spectrum disorder. *Nature Reviews Neuroscience*, 16(9), 551–563.  
902 <https://doi.org/10.1038/nrn3992>
- 903 Box, J. F. (1980). R. A. Fisher and the Design of Experiments, 1922-1926. *The*  
904 *American Statistician*, 34(1), 1. <https://doi.org/10.2307/2682986>
- 905 Brandler, W. M., Antaki, D., Gujral, M., Kleiber, M. L., Whitney, J., Maile, M. S., ...  
906 Sebat, J. (2018). Paternally inherited cis-regulatory structural variants are  
907 associated with autism. *Science (New York, N.Y.)*, 360(6386), 327–331.  
908 <https://doi.org/10.1126/science.aan2261>
- 909 Bruining, H., Matsui, A., Oguro-Ando, A., Kahn, R. S., van't Spijker, H. M., Akkermans,  
910 G., ... Kas, M. J. (2015). Genetic Mapping in Mice Reveals the Involvement of  
911 Pcdh9 in Long-Term Social and Object Recognition and Sensorimotor  
912 Development. *Biological Psychiatry*, 78(7), 485–495.  
913 <https://doi.org/10.1016/J.BIOPSYCH.2015.01.017>
- 914 Caramaschi, D., Sharp, G. C., Nohr, E. A., Berryman, K., Lewis, S. J., Davey Smith, G.,  
915 & Relton, C. L. (2017). Exploring a causal role of DNA methylation in the  
916 relationship between maternal vitamin B12 during pregnancy and child's IQ at age  
917 8, cognitive performance and educational attainment: A two-step Mendelian  
918 randomization study. *Human Molecular Genetics*, 26(15), 3001–3013.  
919 <https://doi.org/10.1093/hmg/ddx164>
- 920 Carninci, P., Sandelin, A., Lenhard, B., Katayama, S., Shimokawa, K., Ponjavic, J., ...  
921 Hayashizaki, Y. (2006). Genome-wide analysis of mammalian promoter  
922 architecture and evolution. *Nature Genetics*, 38(6), 626–635.  
923 <https://doi.org/10.1038/ng1789>
- 924 Carnevali, J. B. C., Ribeiro, E. B., Folli, F., Velloso, L. A., & Saad, M. J. A. (2003).  
925 Interaction between Leptin and Insulin Signaling Pathways Differentially Affects  
926 JAK-STAT and PI 3-Kinase-Mediated Signaling in Rat Liver. *Biological Chemistry*,  
927 384(1), 151–9. <https://doi.org/10.1515/BC.2003.016>
- 928 Chambers, J. C., Elliott, P., Zabaneh, D., Zhang, W., Li, Y., Froguel, P., ... Kooner, J. S.  
929 (2008). Common genetic variation near MC4R is associated with waist  
930 circumference and insulin resistance. *Nature Genetics*, 40(6), 716–718.  
931 <https://doi.org/10.1038/ng.156>
- 932 Chawarska, K., Shic, F., Macari, S., Campbell, D. J., Brian, J., Landa, R., ... Bryson, S.  
933 (2014). 18-month predictors of later outcomes in younger siblings of children with  
934 autism spectrum disorder: a baby siblings research consortium study. *Journal of*  
935 *the American Academy of Child and Adolescent Psychiatry*, 53(12), 1317–1327.e1.  
936 <https://doi.org/10.1016/j.jaac.2014.09.015>
- 937 Cheung, I., Shulha, H. P., Jiang, Y., Matevossian, A., Wang, J., Weng, Z., & Akbarian,  
938 S. (2010). Developmental regulation and individual differences of neuronal  
939 H3K4me3 epigenomes in the prefrontal cortex. *Proceedings of the National*  
940 *Academy of Sciences of the United States of America*, 107(19), 8824–9.  
941 <https://doi.org/10.1073/pnas.1001702107>
- 942 Coulson, R. L., Yasui, D. H., Dunaway, K., Laufer, B. I., Vogel Ciernia, A., Zhu, Y., ...  
943 Lasalle, J. M. (2018). Snord116-dependent diurnal rhythm of DNA methylation in  
944 mouse cortex. *Nat Commun.*, (2018), 1–11. [https://doi.org/10.1038/s41467-018-](https://doi.org/10.1038/s41467-018-03676-0)  
945 [03676-0](https://doi.org/10.1038/s41467-018-03676-0)
- 946 Crawley, J. N., Heyer, W. D., & LaSalle, J. M. (2016). Autism and Cancer Share Risk



- 947 Genes, Pathways, and Drug Targets. *Trends in Genetics*, 32(3), 139–146.  
948 <https://doi.org/10.1016/j.tig.2016.01.001>
- 949 Dapretto, M., Davies, M. S., Pfeifer, J. H., Scott, A. A., Sigman, M., Bookheimer, S. Y.,  
950 & Iacoboni, M. (2006). Understanding emotions in others: mirror neuron dysfunction  
951 in children with autism spectrum disorders. *Nature Neuroscience*, 9(1), 28–30.  
952 <https://doi.org/10.1038/nn1611>
- 953 Dunaway, K. W., Islam, M. S., Coulson, R. L., Lopez, S. J., Vogel Ciernia, A., Chu, R.  
954 G., ... LaSalle, J. M. (2016). Cumulative Impact of Polychlorinated Biphenyl and  
955 Large Chromosomal Duplications on DNA Methylation, Chromatin, and Expression  
956 of Autism Candidate Genes. *Cell Reports*, 17(11), 3035–3048.  
957 <https://doi.org/10.1016/j.celrep.2016.11.058>
- 958 Eck, M. J., Dhe-Paganon, S., Trüb, T., Nolte, R. T., & Shoelson, S. E. (1996). Structure  
959 of the IRS-1 PTB Domain Bound to the Juxtamembrane Region of the Insulin  
960 Receptor. *Cell*, 85(5), 695–705. [https://doi.org/10.1016/S0092-8674\(00\)81236-2](https://doi.org/10.1016/S0092-8674(00)81236-2)
- 961 ENCODE Project Consortium, T. E. P. (2012). An integrated encyclopedia of DNA  
962 elements in the human genome. *Nature*, 489(7414), 57–74.  
963 <https://doi.org/10.1038/nature11247>
- 964 Englund, C., Fink, A., Lau, C., Pham, D., Daza, R. A. M., Bulfone, A., ... Hevner, R. F.  
965 (2005). Pax6, Tbr2, and Tbr1 are expressed sequentially by radial glia,  
966 intermediate progenitor cells, and postmitotic neurons in developing neocortex. *The*  
967 *Journal of Neuroscience : The Official Journal of the Society for Neuroscience*,  
968 25(1), 247–51. <https://doi.org/10.1523/JNEUROSCI.2899-04.2005>
- 969 Ernst, J., & Kellis, M. (2012). ChromHMM: automating chromatin-state discovery and  
970 characterization. *Nature Methods*, 9(3), 215–216.  
971 <https://doi.org/10.1038/nmeth.1906>
- 972 Ernst, J., & Kellis, M. (2017). Chromatin-state discovery and genome annotation with  
973 ChromHMM. *Nature Protocols*, 12(12), 2478–2492.  
974 <https://doi.org/10.1038/nprot.2017.124>
- 975 Fang, Q. L., Yin, Y. R., Xie, C. R., Zhang, S., Zhao, W. X., Pan, C., ... Yin, Z. Y. (2015).  
976 Mechanistic and biological significance of DNA methyltransferase 1 upregulated by  
977 growth factors in human hepatocellular carcinoma. *International Journal of*  
978 *Oncology*, 46(2), 782–790. <https://doi.org/10.3892/ijo.2014.2776>
- 979 Garbett, K., Ebert, P. J., Mitchell, A., Lintas, C., Manzi, B., Mirnics, K., & Persico, A. M.  
980 (2008). Immune transcriptome alterations in the temporal cortex of subjects with  
981 autism. *Neurobiology of Disease*, 30(3), 303–311.  
982 <https://doi.org/10.1016/J.NBD.2008.01.012>
- 983 Geschwind, D. H., & Levitt, P. (2007). Autism spectrum disorders: developmental  
984 disconnection syndromes. *Current Opinion in Neurobiology*, 17(1), 103–111.  
985 <https://doi.org/10.1016/J.CONB.2007.01.009>
- 986 Gilissen, C., Hehir-Kwa, J. Y., Thung, D. T., van de Vorst, M., van Bon, B. W. M.,  
987 Willemsen, M. H., ... Veltman, J. A. (2014). Genome sequencing identifies major  
988 causes of severe intellectual disability. *Nature*, 511(7509), 344–347.  
989 <https://doi.org/10.1038/nature13394>
- 990 Gonzalez-Aguilar, A., Idbaih, A., Boisselier, B., Habbita, N., Rossetto, M., Laurence,  
991 A., ... Hoang-Xuan, K. (2012). Recurrent mutations of MYD88 and TBL1XR1 in  
992 primary central nervous system lymphomas. *Clinical Cancer Research*, 18(19),

- 993 5203–5211. <https://doi.org/10.1158/1078-0432.CCR-12-0845>
- 994 Gonzalez, F. J. (1988). The molecular biology of cytochrome P450s. *Pharmacological*
- 995 *Reviews*, 40(4).
- 996 Grove, J., Ripke, S., Als, T. D., Mattheisen, M., Walters, R., Won, H., ... Børghlum, A. D.
- 997 (2017). Common risk variants identified in autism spectrum disorder. *BioRxiv*,
- 998 224774. <https://doi.org/10.1101/224774>
- 999 Gulati, P., & Thomas, G. (2007). Nutrient sensing in the mTOR/S6K1 signalling
- 1000 pathway. *Biochemical Society Transactions*, 35(Pt 2), 236–8.
- 1001 <https://doi.org/10.1042/BST0350236>
- 1002 Guo, W., Fiziev, P., Yan, W., Cokus, S., Sun, X., Zhang, M. Q., ... Pellegrini, M. (2013).
- 1003 BS-Seeker2: a versatile aligning pipeline for bisulfite sequencing data. *BMC*
- 1004 *Genomics*, 14(1), 774. <https://doi.org/10.1186/1471-2164-14-774>
- 1005 Hakkola, J., Hu, Y., & Ingelman-Sundberg, M. (2002). Mechanisms of Down-Regulation
- 1006 of CYP2E1 Expression by Inflammatory Cytokines in Rat Hepatoma Cells. *Journal*
- 1007 *of Pharmacology and Experimental Therapeutics*, 304(3), 1048–1054.
- 1008 <https://doi.org/10.1124/jpet.102.041582>
- 1009 Hakkola, J., Raunio, H., Purkunen, R., Pelkonen, O., Saarikoski, S., Cresteil, T., &
- 1010 Pasanen, M. (1996). Detection of cytochrome P450 gene expression in human
- 1011 placenta in first trimester of pregnancy. *Biochemical Pharmacology*, 52(2), 379–
- 1012 383. [https://doi.org/10.1016/0006-2952\(96\)00216-X](https://doi.org/10.1016/0006-2952(96)00216-X)
- 1013 Hannon, E., Knox, O., Sugden, K., Burrage, J., Wong, C. C. Y., Belsky, D. W., ... Mill, J.
- 1014 (2018). Characterizing genetic and environmental influences on variable DNA
- 1015 methylation using monozygotic and dizygotic twins. *PLOS Genetics*, 14(8),
- 1016 e1007544. <https://doi.org/10.1371/journal.pgen.1007544>
- 1017 Harold, D., Abraham, R., Hollingworth, P., Sims, R., Gerrish, A., Hamshere, M. L., ...
- 1018 Williams, J. (2009). Genome-wide association study identifies variants at CLU and
- 1019 PICALM associated with Alzheimer's disease. *Nature Genetics*, 41(10), 1088–
- 1020 1093. <https://doi.org/10.1038/ng.440>
- 1021 Hertz-Picciotto, I., Schmidt, R. J., Walker, C. K., Bennett, D. H., Oliver, M., Shedd-Wise,
- 1022 K. M., ... Ozonoff, S. (2018). A Prospective Study of Environmental Exposures and
- 1023 Early Biomarkers in Autism Spectrum Disorder: Design, Protocols, and Preliminary
- 1024 Data from the MARBLES Study. *Environmental Health Perspectives*, 126(11),
- 1025 117004. <https://doi.org/10.1289/EHP535>
- 1026 Hofmann, M., Schuster-Gossler, K., Watabe-Rudolph, M., Aulehla, A., Herrmann, B. G.,
- 1027 & Gossler, A. (2004). WNT signaling, in synergy with T/TBX6, controls Notch
- 1028 signaling by regulating Dll1 expression in the presomitic mesoderm of mouse
- 1029 embryos. *Genes & Development*, 18(22), 2712–7.
- 1030 <https://doi.org/10.1101/gad.1248604>
- 1031 Howsmon, D. P., Kruger, U., Melnyk, S., James, S. J., & Hahn, J. (2017). Classification
- 1032 and adaptive behavior prediction of children with autism spectrum disorder based
- 1033 upon multivariate data analysis of markers of oxidative stress and DNA
- 1034 methylation. *PLoS Computational Biology*, 13(3), 1–15.
- 1035 <https://doi.org/10.1371/journal.pcbi.1005385>
- 1036 Huang, K., & Fingar, D. C. (2014). Growing knowledge of the mTOR signaling network.
- 1037 *Seminars in Cell & Developmental Biology*, 36, 79–90.
- 1038 <https://doi.org/10.1016/J.SEMCDB.2014.09.011>

- 1039 Hussman, J. P., Chung, R.-H., Griswold, A. J., Jaworski, J. M., Salyakina, D., Ma, D., ...  
1040 Pericak-Vance, M. A. (2011). A noise-reduction GWAS analysis implicates altered  
1041 regulation of neurite outgrowth and guidance in autism. *Molecular Autism*, 2(1), 1.  
1042 <https://doi.org/10.1186/2040-2392-2-1>
- 1043 Ihle, J. N. (1995). Cytokine receptor signalling. *Nature*, 377(6550), 591–594.  
1044 <https://doi.org/10.1038/377591a0>
- 1045 Iossifov, I., O’Roak, B. J., Sanders, S. J., Ronemus, M., Krumm, N., Levy, D., ... Wigler,  
1046 M. (2014). The contribution of de novo coding mutations to autism spectrum  
1047 disorder. *Nature*, 515(7526), 216–221. <https://doi.org/10.1038/nature13908>
- 1048 Jonakait, G. M. (2007). The effects of maternal inflammation on neuronal development:  
1049 possible mechanisms. *International Journal of Developmental Neuroscience*, 25(7),  
1050 415–425. <https://doi.org/10.1016/J.IJDEVNEU.2007.08.017>
- 1051 Jones, M. B., & Szatmari, P. (1988). Stoppage rules and genetic studies of autism.  
1052 *Journal of Autism and Developmental Disorders*, 18(1), 31–40.  
1053 <https://doi.org/10.1007/BF02211816>
- 1054 Jones, S. M., Boobis, A. R., Moore, G. E., & Stanier, P. M. (1992). Expression of  
1055 CYP2E1 during human fetal development: methylation of the CYP2E1 gene in  
1056 human fetal and adult liver samples. *Biochemical Pharmacology*, 43(8), 1876–  
1057 1879. [https://doi.org/10.1016/0006-2952\(92\)90726-Y](https://doi.org/10.1016/0006-2952(92)90726-Y)
- 1058 Jover, R., Bort, R., Gómez-Lechón, M. J., & Castell, J. V. (2002). Down-regulation of  
1059 human CYP3A4 by the inflammatory signal interleukin-6: molecular mechanism  
1060 and transcription factors involved. *The FASEB Journal : Official Publication of the*  
1061 *Federation of American Societies for Experimental Biology*, 16(13), 1799–1801.  
1062 <https://doi.org/10.1096/fj.02-0195fje>
- 1063 Kalkbrenner, A. E., Schmidt, R. J., & Penlesky, A. C. (2014). Environmental chemical  
1064 exposures and autism spectrum disorders: a review of the epidemiological  
1065 evidence. *Current Problems in Pediatric and Adolescent Health Care*, 44(10), 277–  
1066 318. <https://doi.org/10.1016/j.cppeds.2014.06.001>
- 1067 Kalkman, H. (2012). A review of the evidence for the canonical Wnt pathway in autism  
1068 spectrum disorders. *Molecular Autism*, 3(1), 10. [https://doi.org/10.1186/2040-2392-](https://doi.org/10.1186/2040-2392-3-10)  
1069 [3-10](https://doi.org/10.1186/2040-2392-3-10)
- 1070 Katoh, M., & Katoh, M. (2006). Notch ligand, JAG1, is evolutionarily conserved target of  
1071 canonical WNT signaling pathway in progenitor cells. *International Journal of*  
1072 *Molecular Medicine*, 17(4), 681–685. <https://doi.org/10.3892/ijmm.17.4.681>
- 1073 Kent, W. J., Sugnet, C. W., Furey, T. S., Roskin, K. M., Pringle, T. H., Zahler, A. M., &  
1074 Haussler, D. (2002). The human genome browser at UCSC. *Genome Research*,  
1075 12(6), 996–1006. <https://doi.org/10.1101/gr.229102>
- 1076 Kishida, M., & Callard, G. V. (2001). Distinct Cytochrome P450 Aromatase Isoforms in  
1077 Zebrafish ( *Danio rerio* ) Brain and Ovary Are Differentially Programmed and  
1078 Estrogen Regulated during Early Development <sup>1</sup>. *Endocrinology*, 142(2), 740–750.  
1079 <https://doi.org/10.1210/endo.142.2.7928>
- 1080 Klezovitch, O., & Vasioukhin, V. (2015). Cadherin signaling: keeping cells in touch.  
1081 *F1000Research*, 4(F1000 Faculty Rev), 550.  
1082 <https://doi.org/10.12688/f1000research.6445.1>
- 1083 Ko, Y., Choi, I., Green, M. L., Simmen, F. A., & Simmen, R. C. M. (1994). Transient  
1084 expression of the cytochrome P450 aromatase gene in elongating porcine

- 1085 blastocysts is correlated with uterine insulin-like growth factor levels during peri-  
1086 implantation development. *Molecular Reproduction and Development*, 37(1), 1–11.  
1087 <https://doi.org/10.1002/mrd.1080370102>
- 1088 Koop, D. R. (1992). Oxidative and reductive metabolism by cytochrome P450 2E1.  
1089 *FASEB Journal: Official Publication of the Federation of American Societies for*  
1090 *Experimental Biology*, 6(2), 724–30. Retrieved from  
1091 <http://www.ncbi.nlm.nih.gov/pubmed/1537462>
- 1092 Koudritsky, M., & Domany, E. (2008). Positional distribution of human transcription  
1093 factor binding sites. *Nucleic Acids Research*, 36(21), 6795–805.  
1094 <https://doi.org/10.1093/nar/gkn752>
- 1095 Koukoura, O., Sifakis, S., & Spandidos, D. A. (2012). DNA methylation in the human  
1096 placenta and fetal growth (review). *Molecular Medicine Reports*, 5(4), 883–9.  
1097 <https://doi.org/10.3892/mmr.2012.763>
- 1098 Krakowiak, P., Walker, C. K., Bremer, A. A., Baker, A. S., Ozonoff, S., Hansen, R. L., &  
1099 Hertz-Picciotto, I. (2012). Maternal Metabolic Conditions and Risk for Autism and  
1100 Other Neurodevelopmental Disorders. *Pediatrics*, 129(5), e1121–e1128.  
1101 <https://doi.org/10.1542/peds.2011-2583>
- 1102 Krey, J. F., & Dolmetsch, R. E. (2007). Molecular mechanisms of autism: a possible role  
1103 for Ca<sup>2+</sup> signaling. *Current Opinion in Neurobiology*, 17(1), 112–119.  
1104 <https://doi.org/10.1016/J.CONB.2007.01.010>
- 1105 Kundaje, A., Meuleman, W., Ernst, J., Bilenky, M., Yen, A., Heravi-Moussavi, A., ...  
1106 Kellis, M. (2015). Integrative analysis of 111 reference human epigenomes. *Nature*,  
1107 518(7539), 317–330. <https://doi.org/10.1038/nature14248>
- 1108 Landi, M. T., Chatterjee, N., Yu, K., Goldin, L. R., Goldstein, A. M., Rotunno, M., ...  
1109 Caporaso, N. E. (2009). A Genome-wide Association Study of Lung Cancer  
1110 Identifies a Region of Chromosome 5p15 Associated with Risk for  
1111 Adenocarcinoma. *The American Journal of Human Genetics*, 85(5), 679–691.  
1112 <https://doi.org/10.1016/J.AJHG.2009.09.012>
- 1113 Laplante, M., & Sabatini, D. M. (2012). mTOR Signaling in Growth Control and Disease.  
1114 *Cell*, 149(2), 274–293. <https://doi.org/10.1016/j.cell.2012.03.017>
- 1115 Laplante, M., & Sabatini, D. M. (2013). Regulation of mTORC1 and its impact on gene  
1116 expression at a glance. *Journal of Cell Science*, 126(8), 1713–1719.  
1117 <https://doi.org/10.1242/jcs.125773>
- 1118 Li, M., Fallin, M. D., Riley, A., Landa, R., Walker, S. O., Silverstein, M., ... Wang, X.  
1119 (2016). The Association of Maternal Obesity and Diabetes With Autism and Other  
1120 Developmental Disabilities. *Pediatrics*, 137(2), e20152206.  
1121 <https://doi.org/10.1542/peds.2015-2206>
- 1122 Lin, R.-K., & Wang, Y.-C. (2014). Dysregulated transcriptional and post-translational  
1123 control of DNA methyltransferases in cancer. *Cell & Bioscience*, 4(1), 46.  
1124 <https://doi.org/10.1186/2045-3701-4-46>
- 1125 Logan, C. Y., & Nusse, R. (2004). THE WNT SIGNALING PATHWAY IN  
1126 DEVELOPMENT AND DISEASE. *Annual Review of Cell and Developmental*  
1127 *Biology*, 20(1), 781–810. <https://doi.org/10.1146/annurev.cellbio.20.010403.113126>
- 1128 Lord, C., Risi, S., Lambrecht, L., Cook, E. H., Leventhal, B. L., DiLavore, P. C., ...  
1129 Rutter, M. L. (2000). Autism Diagnostic Observation Schedule (ADOS). *Journal of*  
1130 *Autism and Developmental Disorders*, 30(3), 205–23.



- 1131 <https://doi.org/10.1007/BF02211841>.
- 1132 Lord, C., Risi, S., Lambrecht, L., Cook Jr, E., Leventhal, B., DiLavore, P., ... Rutter, M.  
1133 (2000). The Autism Diagnostic Observation Schedule - Generic: A Standard  
1134 Measure of Social and Communication Deficits Associated with the Spectrum of  
1135 Autism. *Journal of Autism and Developmental Disorders*, 30, 205–223.  
1136 <https://doi.org/10.1023/A>
- 1137 Lord, C., Rutter, M., & Le Couteur, A. (1994). Autism Diagnostic Interview-Revised: A  
1138 revised version of a diagnostic interview for caregivers of individuals with possible  
1139 pervasive developmental disorders. *Journal of Autism and Developmental*  
1140 *Disorders*, 24(5), 659–685. <https://doi.org/10.1007/BF02172145>
- 1141 Ma, D. K., Jang, M.-H., Guo, J. U., Kitabatake, Y., Chang, M.-L., Pow-Anpongkul, N., ...  
1142 Song, H. (2009). Neuronal activity-induced Gadd45b promotes epigenetic DNA  
1143 demethylation and adult neurogenesis. *Science (New York, N.Y.)*, 323(5917),  
1144 1074–7. <https://doi.org/10.1126/science.1166859>
- 1145 Machado-Neto, J. A., de Melo Campos, P., & Traina, F. (2018). IRS2 (insulin receptor  
1146 substrate 2). *Atlas of Genetics and Cytogenetics in Oncology and Haematology*,  
1147 (2). <https://doi.org/10.4267/2042/68156>
- 1148 Majdic, G., Sharpe, R. M., O’Shaughnessy, P. J., & Saunders, P. T. (1996). Expression  
1149 of cytochrome P450 17alpha-hydroxylase/C17-20 lyase in the fetal rat testis is  
1150 reduced by maternal exposure to exogenous estrogens. *Endocrinology*, 137(3),  
1151 1063–1070. <https://doi.org/10.1210/endo.137.3.8603575>
- 1152 McLean, C. Y., Bristor, D., Hiller, M., Clarke, S. L., Schaar, B. T., Lowe, C. B., ...  
1153 Bejerano, G. (2010). GREAT improves functional interpretation of cis-regulatory  
1154 regions. *Nature Biotechnology*, 28(5), 495–501. <https://doi.org/10.1038/nbt.1630>
- 1155 Mi, H., Muruganujan, A., & Thomas, P. D. (2012). PANTHER in 2013: modeling the  
1156 evolution of gene function, and other gene attributes, in the context of phylogenetic  
1157 trees. *Nucleic Acids Research*, 41(D1), D377–D386.  
1158 <https://doi.org/10.1093/nar/gks1118>
- 1159 Mordaunt, C. E., Park, B. Y., Bakulski, K. M., Feinberg, J. I., Croen, L. A., Ladd-Acosta,  
1160 C., ... Fallin, D. D. (2018). A meta-analysis of two high-risk prospective cohort  
1161 studies reveals autism-specific transcriptional changes to chromatin, autoimmune,  
1162 and environmental response genes in umbilical cord blood. *BioRxiv*, 486498.  
1163 <https://doi.org/10.1101/486498>
- 1164 Mordaunt, C. E., Shibata, N. M., Kieffer, D. A., Członkowska, A., Litwin, T., Weiss, K.  
1165 H., ... Medici, V. (2018). Epigenetic changes of the thioredoxin system in the tx-j  
1166 mouse model and in patients with Wilson disease. *Human Molecular Genetics*.  
1167 <https://doi.org/10.1093/hmg/ddy262>
- 1168 Mullen, E. (1995). *Mullen scales of early learning*. Retrieved from [http://www.v-](http://www.v-psyche.com/doc/special-cases/Mullen Scales of Early Learning.docx)  
1169 [psyche.com/doc/special-cases/Mullen Scales of Early Learning.docx](http://www.v-psyche.com/doc/special-cases/Mullen Scales of Early Learning.docx)
- 1170 Nusse, R., & Clevers, H. (2017). Wnt/ $\beta$ -Catenin Signaling, Disease, and Emerging  
1171 Therapeutic Modalities. *Cell*, 169(6), 985–999.  
1172 <https://doi.org/10.1016/j.cell.2017.05.016>
- 1173 Orlik, H., & Halawa, N. (2016). Metabolic Side Effects of Antipsychotic Medications in  
1174 Children and Adolescents with Autism Spectrum Disorder (ASD). *Child and*  
1175 *Adolescent Psychopharmacology News*, 21(3), 1–9.  
1176 <https://doi.org/10.1521/capn.2016.21.3.1>

- 1177 Ozonoff, S., Young, G. S., Belding, A., Hill, M., Hill, A., Hutman, T., ... Iosif, A. M.  
1178 (2014). The broader autism phenotype in infancy: When does it emerge? *Journal of*  
1179 *the American Academy of Child and Adolescent Psychiatry*, 53(4).  
1180 <https://doi.org/10.1016/j.jaac.2013.12.020>
- 1181 Park, H. J., Kim, S. K., Kang, W. S., Park, J. K., Kim, Y. J., Nam, M., ... Chung, J. H.  
1182 (2016). Association between IRS1 Gene Polymorphism and Autism Spectrum  
1183 Disorder: A Pilot Case-Control Study in Korean Males. *International Journal of*  
1184 *Molecular Sciences*, 17(8), 1–8. <https://doi.org/10.3390/ijms17081227>
- 1185 Patel, S. A. A., Bhabra, U., Charalambous, M. P., David, R. M., Edwards, R. J.,  
1186 Lightfoot, T., ... Gooderham, N. J. (2014). Interleukin-6 mediated upregulation of  
1187 CYP1B1 and CYP2E1 in colorectal cancer involves DNA methylation, miR27b and  
1188 STAT3. *British Journal of Cancer*, 111(12), 2287–2296.  
1189 <https://doi.org/10.1038/bjc.2014.540>
- 1190 Patti, M. E., Sun, X. J., Bruening, J. C., Araki, E., Lipes, M. A., White, M. F., & Kahn, C.  
1191 R. (1995). 4PS/insulin receptor substrate (IRS)-2 is the alternative substrate of the  
1192 insulin receptor in IRS-1-deficient mice. *The Journal of Biological Chemistry*,  
1193 270(42), 24670–3. Retrieved from <http://www.ncbi.nlm.nih.gov/pubmed/7559579>
- 1194 Pons, L., Cordier, M. P., Labalme, A., Till, M., Louvrier, C., Schluth-Bolard, C., ...  
1195 Sanlaville, D. (2015). A new syndrome of intellectual disability with dysmorphism  
1196 due to *TBL1XR1* deletion. *American Journal of Medical Genetics Part A*, 167(1),  
1197 164–168. <https://doi.org/10.1002/ajmg.a.36759>
- 1198 Portales-Casamar, E., Kirov, S., Lim, J., Lithwick, S., Swanson, M. I., Ticoll, A., ...  
1199 Wasserman, W. W. (2007). PAZAR: a framework for collection and dissemination  
1200 of cis-regulatory sequence annotation. *Genome Biology*, 8(10), R207.  
1201 <https://doi.org/10.1186/gb-2007-8-10-r207>
- 1202 Rasheed, A., Hines, R. N., & McCarver-May, D. G. (1996). Variation in induction of  
1203 placental cytochrome P450E1: possible role in susceptibility to fetal alcohol  
1204 syndrome? *Pediatr Res*, 39(4), 83.
- 1205 Raz, R., Roberts, A. L., Lyall, K., Hart, J. E., Just, A. C., Laden, F., & Weisskopf, M. G.  
1206 (2015). Autism Spectrum Disorder and Particulate Matter Air Pollution before,  
1207 during, and after Pregnancy: A Nested Case–Control Analysis within the Nurses'  
1208 Health Study II Cohort. *Environmental Health Perspectives*, 123(3), 264–270.  
1209 <https://doi.org/10.1289/ehp.1408133>
- 1210 Relton, C. L., Wilding, C. S., Laffling, A. J., Jonas, P. A., Burgess, T., Binks, K., ... Burn,  
1211 J. (2004). Low erythrocyte folate status and polymorphic variation in folate-related  
1212 genes are associated with risk of neural tube defect pregnancy. *Molecular Genetics*  
1213 *and Metabolism*, 81(4), 273–281. <https://doi.org/10.1016/j.ymgme.2003.12.010>
- 1214 Ritvo, E. R., Freeman, B. J., Pingree, C., Mason-Brothers, A., Jorde, L., Jenson, W.  
1215 R., ... Ritvo, A. (1989). The UCLA-University of Utah epidemiologic survey of  
1216 autism: prevalence. *American Journal of Psychiatry*, 146(2), 194–199.  
1217 <https://doi.org/10.1176/ajp.146.2.194>
- 1218 Rueden, C. T., Schindelin, J., Hiner, M. C., DeZonia, B. E., Walter, A. E., Arena, E. T., &  
1219 Eliceiri, K. W. (2017). ImageJ2: ImageJ for the next generation of scientific image  
1220 data. *BMC Bioinformatics*, 18(1), 529. <https://doi.org/10.1186/s12859-017-1934-z>
- 1221 Rui, L., Yuan, M., Frantz, D., Shoelson, S., & White, M. F. (2002). SOCS-1 and SOCS-3  
1222 block insulin signaling by ubiquitin-mediated degradation of IRS1 and IRS2. *The*

- 1223 *Journal of Biological Chemistry*, 277(44), 42394–8.  
1224 <https://doi.org/10.1074/jbc.C200444200>
- 1225 Rush, E. C., Katre, P., & Yajnik, C. S. (2014). Vitamin B12: one carbon metabolism,  
1226 fetal growth and programming for chronic disease. *European Journal of Clinical*  
1227 *Nutrition*, 68(1), 2–7. <https://doi.org/10.1038/ejcn.2013.232>
- 1228 Saad, M. J., Carvalho, C. R., Thirone, A. C., & Velloso, L. A. (1996). Insulin induces  
1229 tyrosine phosphorylation of JAK2 in insulin-sensitive tissues of the intact rat. *The*  
1230 *Journal of Biological Chemistry*, 271(36), 22100–4.  
1231 <https://doi.org/10.1074/JBC.271.36.22100>
- 1232 Saad, M. J., Velloso, L. A., & Carvalho, C. R. (1995). Angiotensin II induces tyrosine  
1233 phosphorylation of insulin receptor substrate 1 and its association with  
1234 phosphatidylinositol 3-kinase in rat heart. *The Biochemical Journal*, 310 ( Pt 3)(Pt  
1235 3), 741–4. Retrieved from <http://www.ncbi.nlm.nih.gov/pubmed/7575404>
- 1236 Sanders, S. J., He, X., Willsey, A. J., Ercan-Sencicek, A. G., Samocha, K. E., Cicek, A.  
1237 E., ... State, M. W. (2015). Insights into Autism Spectrum Disorder Genomic  
1238 Architecture and Biology from 71 Risk Loci. *Neuron*, 87(6), 1215–1233.  
1239 <https://doi.org/10.1016/j.neuron.2015.09.016>
- 1240 Sandoval, J., Heyn, H., Moran, S., Serra-Musach, J., Pujana, M. A., Bibikova, M., &  
1241 Esteller, M. (2011). Validation of a DNA methylation microarray for 450,000 CpG  
1242 sites in the human genome. *Epigenetics*, 6(6), 692–702.  
1243 <https://doi.org/10.4161/epi.6.6.16196>
- 1244 Schlessinger, J., & Lemmon, M. A. (2003). SH2 and PTB domains in tyrosine kinase  
1245 signaling. *Science's STKE : Signal Transduction Knowledge Environment*,  
1246 2003(191), RE12. <https://doi.org/10.1126/stke.2003.191.re12>
- 1247 Schmidt, R. J., Hansen, R. L., Hartiala, J., Allayee, H., Schmidt, L. C., Tancredi, D.  
1248 J., ... Hertz-Picciotto, I. (2011). Prenatal vitamins, one-carbon metabolism gene  
1249 variants, and risk for autism. *Epidemiology (Cambridge, Mass.)*, 22(4), 476–85.  
1250 <https://doi.org/10.1097/EDE.0b013e31821d0e30>
- 1251 Schmidt, R. J., Schroeder, D. I., Crary-Dooley, F. K., Barkoski, J. M., Tancredi, D. J.,  
1252 Walker, C. K., ... LaSalle, J. M. (2016). Self-reported pregnancy exposures and  
1253 placental DNA methylation in the MARBLES prospective autism sibling study.  
1254 *Environmental Epigenetics*, 2(4), dvw024-dvw024.  
1255 <https://doi.org/10.1093/eep/dvw024>
- 1256 Schmidt, R. J., Tancredi, D. J., Ozonoff, S., Hansen, R. L., Hartiala, J., Allayee, H., ...  
1257 Hertz-Picciotto, I. (2012). Maternal periconceptional folic acid intake and risk of  
1258 autism spectrum disorders and developmental delay in the CHARGE (CHildhood  
1259 Autism Risks from Genetics and Environment) case-control study. *American*  
1260 *Journal of Clinical Nutrition*, 96(1), 80–89. <https://doi.org/10.3945/ajcn.110.004416>
- 1261 Schneider, C. A., Rasband, W. S., & Eliceiri, K. W. (2012). NIH Image to ImageJ: 25  
1262 years of image analysis. *Nature Methods*, 9(7), 671–675.  
1263 <https://doi.org/10.1038/nmeth.2089>
- 1264 Schroeder, D. I., Blair, J. D., Lott, P., Yu, H. O. K., Hong, D., Crary, F., ... LaSalle, J. M.  
1265 (2013). The human placenta methylome. *Proceedings of the National Academy of*  
1266 *Sciences of the United States of America*, 110(15), 6037–42.  
1267 <https://doi.org/10.1073/pnas.1215145110>
- 1268 Schroeder, D. I., Jayashankar, K., Douglas, K. C., Thirkill, T. L., York, D., Dickinson, P.

- 1269 J., ... LaSalle, J. M. (2015). Early Developmental and Evolutionary Origins of Gene  
1270 Body DNA Methylation Patterns in Mammalian Placentas. *PLoS Genetics*, 11(8),  
1271 1–20. <https://doi.org/10.1371/journal.pgen.1005442>
- 1272 Schroeder, D. I., Lott, P., Korf, I., & LaSalle, J. M. (2011). Large-scale methylation  
1273 domains mark a functional subset of neuronally expressed genes. *Genome*  
1274 *Research*, 21(10), 1583–91. <https://doi.org/10.1101/gr.119131.110>
- 1275 Schroeder, D. I., Schmidt, R. J., Crary-Dooley, F. K., Walker, C. K., Ozonoff, S.,  
1276 Tancredi, D. J., ... LaSalle, J. M. (2016). Placental methylome analysis from a  
1277 prospective autism study. *Molecular Autism*, 7(1), 51.  
1278 <https://doi.org/10.1186/s13229-016-0114-8>
- 1279 Sheffield, N. C., & Bock, C. (2016). LOLA: enrichment analysis for genomic region sets  
1280 and regulatory elements in R and Bioconductor. *Bioinformatics*, 32(4), 587–589.  
1281 <https://doi.org/10.1093/bioinformatics/btv612>
- 1282 Shen, E., Shulha, H., Weng, Z., & Akbarian, S. (2014). Regulation of histone H3K4  
1283 methylation in brain development and disease. *Philosophical Transactions of the*  
1284 *Royal Society B: Biological Sciences*. <https://doi.org/10.1098/rstb.2013.0514>
- 1285 Shen, L., Shao, N.-Y., Liu, X., Maze, I., Feng, J., & Nestler, E. J. (2013). diffReps:  
1286 Detecting Differential Chromatin Modification Sites from ChIP-seq Data with  
1287 Biological Replicates. *PLoS ONE*, 8(6), e65598.  
1288 <https://doi.org/10.1371/journal.pone.0065598>
- 1289 Shilatifard, A. (2008). Molecular implementation and physiological roles for histone H3  
1290 lysine 4 (H3K4) methylation. *Current Opinion in Cell Biology*, 20(3), 341–348.  
1291 <https://doi.org/10.1016/J.CEB.2008.03.019>
- 1292 Shimobayashi, M., & Hall, M. N. (2014). Making new contacts: the mTOR network in  
1293 metabolism and signalling crosstalk. *Nature Reviews Molecular Cell Biology*, 15(3),  
1294 155–162. <https://doi.org/10.1038/nrm3757>
- 1295 Shulha, H. P., Cheung, I., Whittle, C., Wang, J., Virgil, D., Lin, C. L., ... Weng, Z. (2012).  
1296 Epigenetic Signatures of Autism. *Archives of General Psychiatry*, 69(3), 314.  
1297 <https://doi.org/10.1001/archgenpsychiatry.2011.151>
- 1298 Silver, M. J., Kessler, N. J., Hennig, B. J., Dominguez-Salas, P., Laritsky, E., Baker, M.  
1299 S., ... Waterland, R. A. (2015). Independent genomewide screens identify the  
1300 tumor suppressor VTRNA2-1 as a human epiallele responsive to periconceptual  
1301 environment. *Genome Biology*, 16(1), 118. [https://doi.org/10.1186/s13059-015-](https://doi.org/10.1186/s13059-015-0660-y)  
1302 [0660-y](https://doi.org/10.1186/s13059-015-0660-y)
- 1303 Sloan, C. A., Chan, E. T., Davidson, J. M., Malladi, V. S., Strattan, J. S., Hitz, B. C., ...  
1304 Cherry, J. M. (2016). ENCODE data at the ENCODE portal. *Nucleic Acids*  
1305 *Research*, 44(D1), D726–32. <https://doi.org/10.1093/nar/gkv1160>
- 1306 Smallwood, S. A., & Kelsey, G. (2012a). De novo DNA methylation: a germ cell  
1307 perspective. *Trends in Genetics*, 28(1), 33–42.  
1308 <https://doi.org/10.1016/j.tig.2011.09.004>
- 1309 Smallwood, S. A., & Kelsey, G. (2012b). De novo DNA methylation: A germ cell  
1310 perspective. *Trends in Genetics*, 28(1), 33–42.  
1311 <https://doi.org/10.1016/j.tig.2011.09.004>
- 1312 Sultan, F. A., Wang, J., Tront, J., Liebermann, D. A., & Sweatt, J. D. (2012). Genetic  
1313 Deletion of gadd45b, a Regulator of Active DNA Demethylation, Enhances Long-  
1314 Term Memory and Synaptic Plasticity. *Journal of Neuroscience*, 32(48), 17059–



- 1315 17066. <https://doi.org/10.1523/JNEUROSCI.1747-12.2012>
- 1316 Sun, W., Poschmann, J., Cruz-Herrera del Rosario, R., Parikshak, N. N., Hajan, H. S.,  
1317 Kumar, V., ... Prabhakar, S. (2016). Histone Acetylome-wide Association Study of  
1318 Autism Spectrum Disorder. *Cell*, 167(5), 1385–1397.e11.  
1319 <https://doi.org/10.1016/J.CELL.2016.10.031>
- 1320 Sun, X. J., Wang, L.-M., Zhang, Y., Yenush, L., Myers Jr, M. G., Glasheen, E., ... White,  
1321 M. F. (1995). Role of IRS-2 in insulin and cytokine signalling. *Nature*, 377(6545),  
1322 173–177. <https://doi.org/10.1038/377173a0>
- 1323 Suren, P., Roth, C., Bresnahan, M., Haugen, M., Hornig, M., Hirtz, D., ... Stoltenberg,  
1324 C. (2013). Association between maternal use of folic acid supplements and risk of  
1325 autism spectrum disorders in children. *Journal of the American Medical*  
1326 *Association*, 309(6), 570–577.  
1327 <https://doi.org/10.1001/jama.2012.155925.ASSOCIATION>
- 1328 Tabet, A. C., Leroy, C., Dupont, C., Serrano, E., Hernandez, K., Gallard, J., ... Verloes,  
1329 A. (2014). De novo deletion of TBL1XR1 in a child with non-specific developmental  
1330 delay supports its implication in intellectual disability. *American Journal of Medical*  
1331 *Genetics, Part A*, 164(9), 2335–2337. <https://doi.org/10.1002/ajmg.a.36619>
- 1332 Tamburini, J., Chapuis, N., Bardet, V., Park, S., Sujobert, P., Willems, L., ... Bouscary,  
1333 D. (2008). Mammalian target of rapamycin (mTOR) inhibition activates  
1334 phosphatidylinositol 3-kinase/Akt by up-regulating insulin-like growth factor-1  
1335 receptor signaling in acute myeloid leukemia: rationale for therapeutic inhibition of  
1336 both pathways. *Blood*, 111(1), 379–82. <https://doi.org/10.1182/blood-2007-03-080796>
- 1337
- 1338 Teh, A. L., Pan, H., Chen, L., Ong, M. L., Dogra, S., Wong, J., ... Holbrook, J. D. (2014).  
1339 The effect of genotype and in utero environment on interindividual variation in  
1340 neonate DNA methylomes. *Genome Research*, 24(7), 1064–1074.  
1341 <https://doi.org/10.1101/gr.171439.113>
- 1342 The Gene Ontology Consortium. (2017). Expansion of the Gene Ontology  
1343 knowledgebase and resources. *Nucleic Acids Research*, 45(D1), D331–D338.  
1344 <https://doi.org/10.1093/nar/gkw1108>
- 1345 Thomas, P. D., Campbell, M. J., Kejariwal, A., Mi, H., Karlak, B., Daverman, R., ...  
1346 Narechania, A. (2003). PANTHER: a library of protein families and subfamilies  
1347 indexed by function. *Genome Research*, 13(9), 2129–41.  
1348 <https://doi.org/10.1101/gr.772403>
- 1349 Timp, W., Bravo, H. C., McDonald, O. G., Goggins, M., Umbricht, C., Zeiger, M., ...  
1350 Irizarry, R. A. (2014). Large hypomethylated blocks as a universal defining  
1351 epigenetic alteration in human solid tumors. *Genome Medicine*, 6(8), 61.  
1352 <https://doi.org/10.1186/s13073-014-0061-y>
- 1353 Traglia, M., Croen, L. A., Lyall, K., Windham, G. C., Kharrazi, M., DeLorenze, G. N., ...  
1354 Weiss, L. A. (2017). Independent Maternal and Fetal Genetic Effects on Mid-  
1355 gestational Circulating Levels of Environmental Pollutants. *G3 (Bethesda, Md.)*,  
1356 7(April), g3.117.039784. <https://doi.org/10.1534/g3.117.039784>
- 1357 Tsai, P. C., & Bell, J. T. (2015). Power and sample size estimation for epigenome-wide  
1358 association scans to detect differential DNA methylation. *International Journal of*  
1359 *Epidemiology*, 44(4), 1429–1441. <https://doi.org/10.1093/ije/dyv041>
- 1360 Turner, T. N., Hormozdiari, F., Duyzend, M. H., McClymont, S. A., Hook, P. W., Iossifov,

- 1361 I., ... Eichler, E. E. (2016). Genome Sequencing of Autism-Affected Families  
1362 Reveals Disruption of Putative Noncoding Regulatory DNA. *American Journal of*  
1363 *Human Genetics*, 98(1), 58–74. <https://doi.org/10.1016/j.ajhg.2015.11.023>
- 1364 Ursini, G., Punzi, G., Chen, Q., Marengo, S., Robinson, J. F., Porcelli, A., ...  
1365 Weinberger, D. R. (2018). Convergence of placenta biology and genetic risk for  
1366 schizophrenia. *Nature Medicine*, 24(6), 792–801. [https://doi.org/10.1038/s41591-](https://doi.org/10.1038/s41591-018-0021-y)  
1367 [018-0021-y](https://doi.org/10.1038/s41591-018-0021-y)
- 1368 Vallianatos, C. N., & Iwase, S. (2015). Disrupted intricacy of histone H3K4 methylation  
1369 in neurodevelopmental disorders. *Epigenomics*, 7(3), 503–519.  
1370 <https://doi.org/10.2217/epi.15.1>
- 1371 Velloso, L. A., Folli, F., Sun, X. J., White, M. F., Saad, M. J., & Kahn, C. R. (1996).  
1372 Cross-talk between the insulin and angiotensin signaling systems. *Proceedings of*  
1373 *the National Academy of Sciences of the United States of America*, 93(22), 12490–  
1374 5. Retrieved from <http://www.ncbi.nlm.nih.gov/pubmed/8901609>
- 1375 Vogel Ciernia, A., & LaSalle, J. (2016). The landscape of DNA methylation amid a  
1376 perfect storm of autism aetiologies. *Nature Reviews Neuroscience*, 17(7), 411–23.  
1377 <https://doi.org/10.1038/nrn.2016.41>
- 1378 Vogel Ciernia, A., Laufer, B. I., Dunaway, K. W., Mordaunt, C. E., Coulson, R. L., Yasui,  
1379 D. H., & LaSalle, J. M. (2018). Epigenomic convergence of genetic and immune  
1380 risk factors in autism brain. *BioRxiv*, 270827. <https://doi.org/10.1101/270827>
- 1381 Voineagu, I., Wang, X., Johnston, P., Lowe, J. K., Tian, Y., Horvath, S., ... Geschwind,  
1382 D. H. (2011). Transcriptomic analysis of autistic brain reveals convergent molecular  
1383 pathology. *Nature*, 474(7351), 380–384. <https://doi.org/10.1038/nature10110>
- 1384 Wang, T., Zeng, Z., Li, T., Liu, J., Li, J., Li, Y., ... Shi, Y. (2010). Common SNPs in  
1385 Myelin Transcription Factor 1-Like (MYT1L): Association with Major Depressive  
1386 Disorder in the Chinese Han Population. *PLoS ONE*, 5(10), e13662.  
1387 <https://doi.org/10.1371/journal.pone.0013662>
- 1388 Watson, E. D., & Cross, J. C. (2005). Development of Structures and Transport  
1389 Functions in the Mouse Placenta. *Physiology*, 20(3), 180–193.  
1390 <https://doi.org/10.1152/physiol.00001.2005>
- 1391 Wessels, W. H., & Pompe van Meerdervoort, M. (1979). Monozygotic twins with early  
1392 infantile autism. A case report. *South African Medical Journal = Suid-Afrikaanse*  
1393 *Tydskrif Vir Geneeskunde*, 55(23), 955–7. Retrieved from  
1394 <http://www.ncbi.nlm.nih.gov/pubmed/572995>
- 1395 White, M. F. (1998). The IRS-signalling system: A network of docking proteins that  
1396 mediate insulin action. In *Insulin Action* (pp. 3–11). Boston, MA: Springer US.  
1397 [https://doi.org/10.1007/978-1-4615-5647-3\\_1](https://doi.org/10.1007/978-1-4615-5647-3_1)
- 1398 Wilks, D. S. (2011). Cluster Analysis. *International Geophysics*, 100, 603–616.  
1399 <https://doi.org/10.1016/B978-0-12-385022-5.00015-4>
- 1400 Withers, D. J., Gutierrez, J. S., Towery, H., Burks, D. J., Ren, J. M., Previs, S., ... White,  
1401 M. F. (1998). Disruption of IRS-2 causes type 2 diabetes in mice. *Nature*,  
1402 391(6670), 900–4. <https://doi.org/10.1038/36116>
- 1403 Xiang, A. H., Wang, X., Martinez, M. P., Page, K., Buchanan, T. A., & Feldman, R. K.  
1404 (2018). Maternal Type 1 Diabetes and Risk of Autism in Offspring. *JAMA*, 320(1),  
1405 89. <https://doi.org/10.1001/jama.2018.7614>
- 1406 Xu, G., Jing, J., Bowers, K., Liu, B., & Bao, W. (2014). Maternal Diabetes and the Risk

- 1407 of Autism Spectrum Disorders in the Offspring: A Systematic Review and Meta-  
1408 Analysis. *Journal of Autism and Developmental Disorders*, 44(4), 766–775.  
1409 <https://doi.org/10.1007/s10803-013-1928-2>
- 1410 Xu, L.-M., Li, J.-R., Huang, Y., Zhao, M., Tang, X., & Wei, L. (2012). AutismKB: an  
1411 evidence-based knowledgebase of autism genetics. *Nucleic Acids Research*,  
1412 40(Database issue), D1016-22. <https://doi.org/10.1093/nar/gkr1145>
- 1413 Yang, C., Bolotin, E., Jiang, T., Sladek, F. M., & Martinez, E. (2007). Prevalence of the  
1414 initiator over the TATA box in human and yeast genes and identification of DNA  
1415 motifs enriched in human TATA-less core promoters. *Gene*, 389(1), 52–65.  
1416 <https://doi.org/10.1016/J.GENE.2006.09.029>
- 1417 Yap, A. S., & Kovacs, E. M. (2003). Direct cadherin-activated cell signaling: a view from  
1418 the plasma membrane. *The Journal of Cell Biology*, 160(1), 11–6.  
1419 <https://doi.org/10.1083/jcb.200208156>
- 1420 Yeo, G. S. H., Farooqi, I. S., Aminian, S., Halsall, D. J., Stanhope, R. G., & O’Rahilly, S.  
1421 (1998). A frameshift mutation in MC4R associated with dominantly inherited human  
1422 obesity. *Nature Genetics*, 20(2), 111–112. <https://doi.org/10.1038/2404>
- 1423 Zeisel, S. H. (2009). Importance of methyl donors during reproduction. *The American*  
1424 *Journal of Clinical Nutrition*, 89(2), 673S–677S.  
1425 <https://doi.org/10.3945/ajcn.2008.26811D>
- 1426 Zeltser, L. M., & Leibel, R. L. (2011). Roles of the placenta in fetal brain development.  
1427 *Proceedings of the National Academy of Sciences of the United States of America*,  
1428 108(38), 15667–8. <https://doi.org/10.1073/pnas.1112239108>
- 1429 Zerbo, O., Iosif, A.-M., Walker, C., Ozonoff, S., Hansen, R. L., & Hertz-Picciotto, I.  
1430 (2013). Is Maternal Influenza or Fever During Pregnancy Associated with Autism or  
1431 Developmental Delays? Results from the CHARGE (Childhood Autism Risks from  
1432 Genetics and Environment) Study. *Journal of Autism and Developmental Disorders*,  
1433 43(1), 25–33. <https://doi.org/10.1007/s10803-012-1540-x>
- 1434 Zhang, S., Deng, L., Jia, Q., Huang, S., Gu, J., Zhou, F., ... Fan, G. (n.d.). dbMDEGA: a  
1435 database for meta-analysis of differentially expressed genes in autism spectrum  
1436 disorder. <https://doi.org/10.1186/s12859-017-1915-2>
- 1437  
1438
